1 **Cuticular hydrocarbon biosynthesis in malaria vectors: insights from the adult oenocyte**  
2 **transcriptome.**

3 Linda Grigoraki<sup>1</sup>, Xavier Grau-Bove<sup>1</sup>, Henrietta Carrington-Yates<sup>1</sup>, Gareth J Lycett<sup>1</sup> and Hilary  
4 Ranson<sup>1</sup>

5 Liverpool School of Tropical Medicine, Vector Biology Department, L3 5QA Liverpool, United  
6 Kingdom

7  
8 Corresponding Authors: Linda Grigoraki, email: [Linda.Grigoraki@lstm.ac.uk](mailto:Linda.Grigoraki@lstm.ac.uk) and Hilary  
9 Ranson, email: [Hilary.Ranson@lstm.ac.uk](mailto:Hilary.Ranson@lstm.ac.uk)

10 **Keywords:** *Anopheles gambiae*, fatty acid synthase, desaturase, cuticle, RNAseq,  
11 Fluorescent Activated Cell Sorting

12 **Abstract**

13 The surface of insects is coated in cuticular hydrocarbons (CHCs); variations in the  
14 composition of this layer affect a range of traits including adaptation to arid environments  
15 and defence against pathogens and toxins. In the African malaria vector, *Anopheles gambiae*  
16 quantitative and qualitative variance in CHC composition have been associated with  
17 speciation, ecological habitat and insecticide resistance. Understanding how these  
18 modifications arise will inform us of how mosquitoes are responding to climate change and  
19 vector control interventions. CHCs are synthesised in sub-epidermal cells called oenocytes  
20 that are very difficult to isolate from surrounding tissue. Here we utilise a transgenic line with  
21 fluorescent oenocytes to purify these cells for the first time. Comparative transcriptomics  
22 revealed the enrichment of biological processes related to long chain fatty acyl-CoA  
23 biosynthesis and elongation of mono-, poly-unsaturated and saturated fatty acids and  
24 enabled us to delineate, and partially validate, the hydrocarbon biosynthetic pathway in *An*  
25 *gambiae*.

26

27 **Introduction**

28 The cuticle, also known as the exoskeleton, is the outermost part of the insect body and plays  
29 a pivotal role in its physiology and ability to adapt and survive in terrestrial environments. The  
30 cuticle consists of multiple layers with different composition and properties. The thickest  
31 layer, the procuticle, is divided into the endo- and exo-cuticle, both of which are rich in chitin  
32 and cuticular proteins. The outer layer, or epi-cuticle, is mainly composed of lipids and  
33 hydrocarbons (Lockey, 1988). Cuticular hydrocarbons (CHCs) are relatively simple molecules  
34 but form complex and varied mixtures of n-alkanes, unsaturated hydrocarbons (alkenes), and  
35 terminally and internally methyl-branched alkanes/alkenes. These mixtures of CHCs protect  
36 insects from desiccation, are the first barrier to infections from microorganisms and can act  
37 as mating recognition signals (pheromones)(Blomquist et al., 2010). The cuticle composition

38 has also been associated with resistance to insecticides, via reduced penetration, in several  
39 insect species (reviewed in (Balabanidou et al., 2018)).

40 *Anopheles* mosquitoes are intensively studied because of their importance as vectors of  
41 malaria and lymphatic filariasis that together affect millions of people every year causing  
42 intolerable levels of mortality and morbidity. Recently it was shown that populations of the  
43 major African malaria vector *Anopheles gambiae* have developed a thicker cuticle with  
44 elevated amounts of hydrocarbons and this is associated with a reduction in the penetration  
45 rate of pyrethroid insecticides contributing to the high levels of resistance observed  
46 (Balabanidou et al., 2016). The emergence of pyrethroid resistance is a major concern for  
47 vector control strategies as it threatens the efficiency of the insecticide treated nets, all of  
48 which contain this insecticide class, that have proven so successful in reducing the malaria  
49 burden in Africa (Bhatt et al., 2015). CHCs are also important in conferring desiccation  
50 tolerance in *An. gambiae*, which may be vital in adaptation to arid conditions and survival  
51 during the dry season. (Reidenbach et al., 2014, Arcaz et al., 2016).

52 Cuticular hydrocarbons are synthesized in oenocytes which are secretory cells of ectodermal  
53 origin found in most, if not all, pterygote insects (Makki et al., 2014). In adult mosquitoes  
54 oenocytes are found in characteristic, predominantly ventral, subcuticular clumps that form  
55 rows in each segment, while in larval stages they are located in small groups underneath each  
56 of the abdominal appendages (Lycett et al., 2006).

57 The biosynthesis of hydrocarbons has been studied using radiolabelled precursors (Dillwith  
58 et al., 1981) and the biochemical steps of their biosynthetic pathway have been established  
59 (Blomquist et al., 2010, Chung and Carroll, 2015). The pathway starts with a fatty acid  
60 synthase (FAS) that uses malonyl-CoA to generate a fatty acyl-CoA. In the case of methyl-  
61 branched hydrocarbons propionyl-CoA groups (as methyl-malonyl-CoA) are also incorporated  
62 in the growing fatty acyl-CoA chain. The fatty acyl-CoA chain is further extended by elongases,  
63 which extend the chain to different lengths depending on their specificity. Desaturases  
64 introduce double bonds, contributing to the generation of unsaturated hydrocarbons, and  
65 reductases convert the generated acyl-CoA to aldehydes. These aldehydes serve as substrates  
66 for the final step of the pathway, which involves a single carbon chain-shortening conversion  
67 to hydrocarbons catalysed by P450 enzymes (Qiu et al., 2012). Only this latter step has been  
68 delineated in *Anopheles* mosquitoes with two P450 decarbonylases identified, Cyp4G16 and  
69 Cyp4G17 (Balabanidou et al., 2016, Kefi et al., 2019).

70 Only a subset of the large number of lipid metabolic enzymes encoded in the genome are  
71 likely to be significant players in CHC synthesis, but we hypothesised that transcripts from  
72 these genes will be specifically enriched in oenocytes to enable this function. Here we report  
73 the isolation of oenocytes from adult *An. gambiae* mosquitoes using a transgenic line with  
74 fluorescently tagged oenocytes (Lynd et al., 2019). RNAseq of the isolated oenocytes  
75 identified the key biological processes enriched in these cells and revealed candidate genes  
76 for each step of the CHC biosynthetic pathway. A member of the putative pathway was

77 validated by perturbing expression of the AGAP001899 fatty acid synthase (hereafter called  
78 FAS1899). The elucidation of this pathway is a major milestone in delineating the role of  
79 variable hydrocarbon composition on key traits that impact vectorial capacity of these  
80 important vectors of human disease.

81

## 82 **Results**

### 83 **FACS isolation of fluorescent oenocytes from transgenic *An. gambiae* mosquitoes**

84 To tag adult *An. gambiae* oenocytes, we expressed the red fluorescent marker m-cherry  
85 specifically in these cells using the GAL4/UAS system (Lynd and Lycett, 2012). Two transgenic  
86 lines were crossed: 1) a homozygous UAS-mCD8: mCherry responder line (Adolfi et al., 2018)  
87 with 2) a homozygous oenocyte enhancer-GAL4 driver line (Oeno-Gal4) (Lynd et al., 2019).  
88 Progeny of this cross had the expected m-cherry fluorescent oenocytes throughout their  
89 development (Lynd et al., 2019). To purify adult oenocytes, mosquitoes were dissected to  
90 expose the oenocytes that are dispersed throughout tissues attached to the ventral  
91 abdominal integument. Their release was facilitated using trypsin and mechanical  
92 homogenization of the tissue (Figure 1A) and subsequent isolation with Fluorescent Activated  
93 Cell Sorting (FACS) (Figure 1B). Tagged cells corresponded to 1-5% of the total events counted  
94 during the FACS sorting and their morphology was consistent with oenocytes by microscopic  
95 inspection of sorted cells (Supplementary Figure 1).

### A. Extraction of mosquito carcass cells

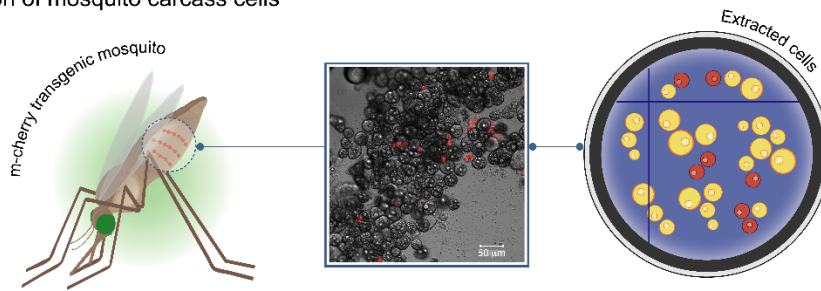

### B. Isolation of oenocytes with FACS

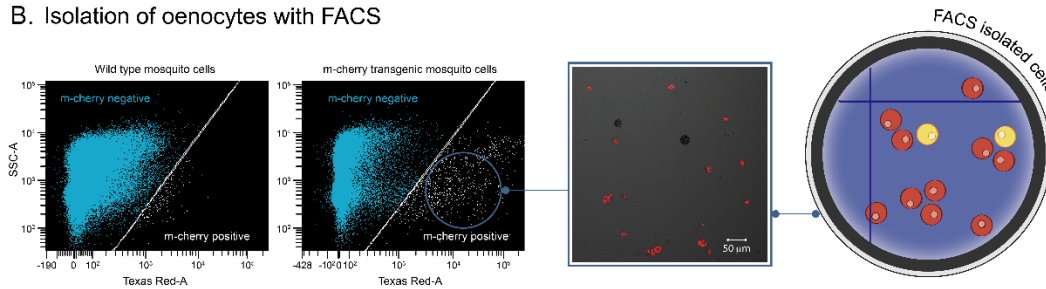

### C. Transcriptomic analysis of oenocytes

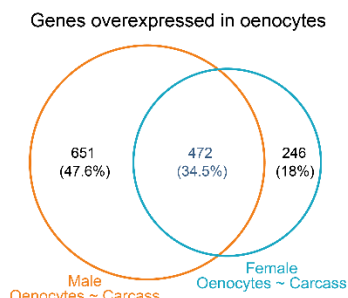

#### Functions enriched in overexpressed genes (n=472)

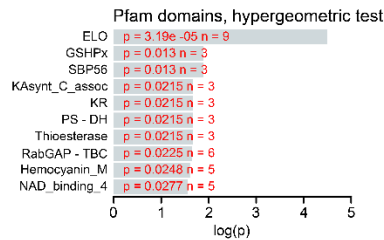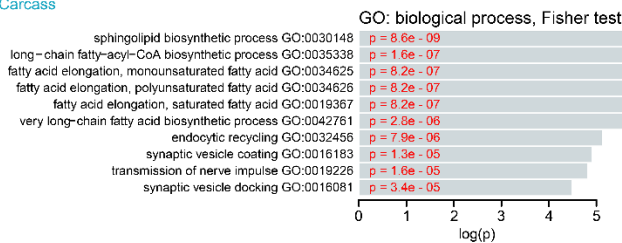

96

### 97 **Figure 1: Isolation of fluorescently tagged oenocytes and transcriptomic analysis with RNAseq. A)**

98 Schematic image of total carcass cells extracted from transgenic *An. gambiae* mosquitoes (progeny of  
 99 UAS-mCD8: mCherry line and Oeno-Gal4 driver line) expressing the m-cherry fluorescent marker in  
 100 oenocytes (red cells). **B)** FACS dot plots. Side-scatter intensity (vertical axis) is plotted against  
 101 fluorescence intensity (horizontal axis). The sample on the left is from wild type G3 mosquitoes, the  
 102 sample on the right is from transgenic mosquitoes with fluorescent oenocytes. The white line crossing  
 103 the plots represents the threshold used for sorting mCherry positive cells. **C)** Transcriptomic analysis  
 104 for isolated oenocytes and total carcass cells. Venn diagram for genes over-expressed in both female  
 105 and male oenocytes vs total carcass cells. Go term (biological process) and Pfam domain enrichment  
 106 analysis is shown for the 472 genes commonly over-expressed in female and male oenocytes. (ELO:  
 107 fatty acid elongation, GSHPx: Glutathione Peroxidase, SBP56: Selenium Binding Protein, KAsynt-C:  
 108 Ketoacyl – synthetase C-terminal extension, KR: KR domain found in polyketide and fatty-acid  
 109 synthases, PS-DH: Polyketide synthase dehydratase, RabGAP-TBC: RabGTPase-TBC domain).

## 110 **Transcriptome analysis of isolated oenocytes and total carcass cells using RNAseq**

111 Triplicate RNAseq libraries were generated using mRNA from isolated tagged cells and total  
112 cell populations (cell preparation before FACS, referred herein as carcass cells) from female  
113 and male mosquitoes, barcoded and run on the same lane of an Illumina HiSeq sequencer  
114 (CGR University of Liverpool). Paired end reads were processed to remove Illumina adapter  
115 sequences and low-quality reads. 97.12% of reads passed the quality control and generated  
116 a total of 425 million reads, of which 58.1% (+/- 0.89% standard error) were successfully  
117 mapped to the annotated transcripts of *An. gambiae* (Vector Base AgamP4.9).

118 To visualize how gene expression varied in the different samples we performed a principal  
119 component analysis (PCA) using the normalised gene counts of each sample. The first  
120 component accounted for 30.1% of the variance in gene expression and separated oenocyte  
121 from carcass samples, whereas the second component accounted for 25.9% of variance and  
122 reflected differences between females and males. All three replicates of each condition (total  
123 female carcass cells, total male carcass cells, female oenocytes, male oenocytes) clustered  
124 together (Supplementary Figure 2) providing support for robustness of replication between  
125 samples.

## 126 **Differential expression analysis reveals genes and biological processes enriched in** 127 **oenocytes**

128 We next identified transcripts significantly over-expressed [ $\log_2(\text{Fold Change}) > 1$ , Benjamini-  
129 Hochberg adjusted  $p$ value  $< 0.001$ , from a Wald test) in oenocytes compared to total (pre-  
130 sorted) cells. Our analysis of differential expression identified 1,123 genes over-expressed in  
131 male oenocytes compared to male carcass cells and 718 genes over-expressed in female  
132 oenocytes compared to female carcass cells. From all over-expressed genes 472 were  
133 commonly over-expressed in both female and male oenocytes (Figure 1C and Supplementary  
134 File 1). Gene Ontology enrichment analysis for these 472 genes showed an enrichment in  
135 biological processes related to sphingolipid biosynthesis, long chain fatty acyl-CoA  
136 biosynthesis and elongation of mono-, poly- unsaturated and saturated fatty acids (Figure 1C),  
137 supporting the role of oenocytes in lipid and hydrocarbon biosynthesis. Other biological  
138 processes enriched in the oenocyte samples included endocytic recycling, synaptic vesicle  
139 coating and docking, and transmission of nerve impulses. Enrichment analysis of Pfam protein  
140 domains showed the over-representation of the ELO family that consists of integral  
141 membrane proteins involved in the elongation of fatty acids (Figure 1C).

142 We also investigated whether specific gene isoforms are differentially expressed in oenocytes  
143 (at  $p < 0.05$ , obtained from an empirical cumulative distribution of isoform frequency changes).  
144 672 genes had at least one isoform differentially expressed in female oenocytes compared to  
145 female total carcass cells and 752 have at least one isoform differentially expressed in male  
146 oenocytes compare to male total carcass cells. The same analysis was performed for female  
147 and male oenocytes showing 578 genes to have at least one isoform differentially expressed  
148 between sexes (Supplementary Document, Supplementary File 2 and Supplementary Figure  
149 3).

## 150 **Identification of key candidate genes in the CHC biosynthetic pathway**

151 We next examined which transcripts from members of the six gene families (propionyl-CoA  
152 synthases, fatty acid synthetases, elongases, desaturases, reductases and P450  
153 decarbonylases) having roles in the hydrocarbon biosynthetic pathway (Figure 2) are  
154 differentially expressed in oenocytes. The two P450s, Cyp4G16 (AGAP001076) and Cyp4G17  
155 (AGAP000877), that catalyse the last step in the production of cuticular hydrocarbons, plus  
156 the P450 reductase (CPR) that supplies electrons to all P450 monooxygenation reactions,  
157 were among the significantly enriched genes (Supplementary File 1). Immunolocalization  
158 experiments have previously shown these genes to be highly expressed in *An. gambiae*  
159 oenocytes (Balabanidou et al., 2016, Lycett et al., 2006), lending confidence that our  
160 experimental design detects oenocyte enriched genes.

161 The single propionyl-CoA synthase, AGAP001473, likely responsible for the generation of  
162 precursor molecules for the synthesis of methyl-branched hydrocarbons (Blomquist et al.,  
163 2010) was enriched in oenocytes. Of the four remaining gene families, specific members were  
164 found to be oenocyte enriched; these consisted of three of the four fatty acid synthases  
165 (AGAP001899, AGAP08468, AGAP028049), nine of the 20 elongases (AGAP013219,  
166 AGAP004372, AGAP001097, AGAP003196, AGAP005512, AGAP007264, AGAP013094,  
167 AGAP003195, AGAP003197), one desaturase (AGAP003050 out of nine in the genome) and  
168 five of the 17 reductases (AGAP005986, AGAP004787, AGAP005984, AGAP004784,  
169 AGAP005985) (Figure 3). In addition, the fatty acid transporter AGAP001763, the ortholog of  
170 the *Drosophila melanogaster Fatp* (CG7400) functionally implicated in CHC biosynthesis,  
171 (Chiang et al., 2016) was also enriched in the *An. gambiae* oenocyte transcriptome. The  
172 majority of these genes were highly expressed in oenocytes (among the top 200 most highly  
173 expressed), with Cyp4G16, Cyp4G17 and FAS1899 (AGAP001899) being in the top ten,  
174 followed by the elongase AGAP007264 (Supplementary tables S2, S3 and Supplementary File  
175 1).

176 Interestingly, several of these genes have highly correlated expression. A meta-analysis of 48  
177 transcriptomic datasets from insecticide resistant and susceptible *Anopheles* populations  
178 (Ingham et al., 2018) identified 44 transcripts co-regulated with Cyp4G16, eight of which were  
179 predicted to be part of the CHC pathway. All these eight transcripts, with at least one from  
180 each of the six gene families, were present in our experimentally determined CHC  
181 synthesizing candidate gene list (Figure 2).

182 Notably expression of four genes with a lipid synthesizing role was significantly reduced in  
183 oenocytes (depicted on Figure 4). These include the fatty acid synthase AGAP009176, the  
184 desaturase AGAP004572, the reductase AGAP003606 and the elongase AGAP003600. Thus,  
185 these genes may be involved in the synthesis of Long Chain Fatty Acids (LCFA) in other tissues,  
186 most likely in the fat body, and not specific to the CHC biosynthetic pathway.

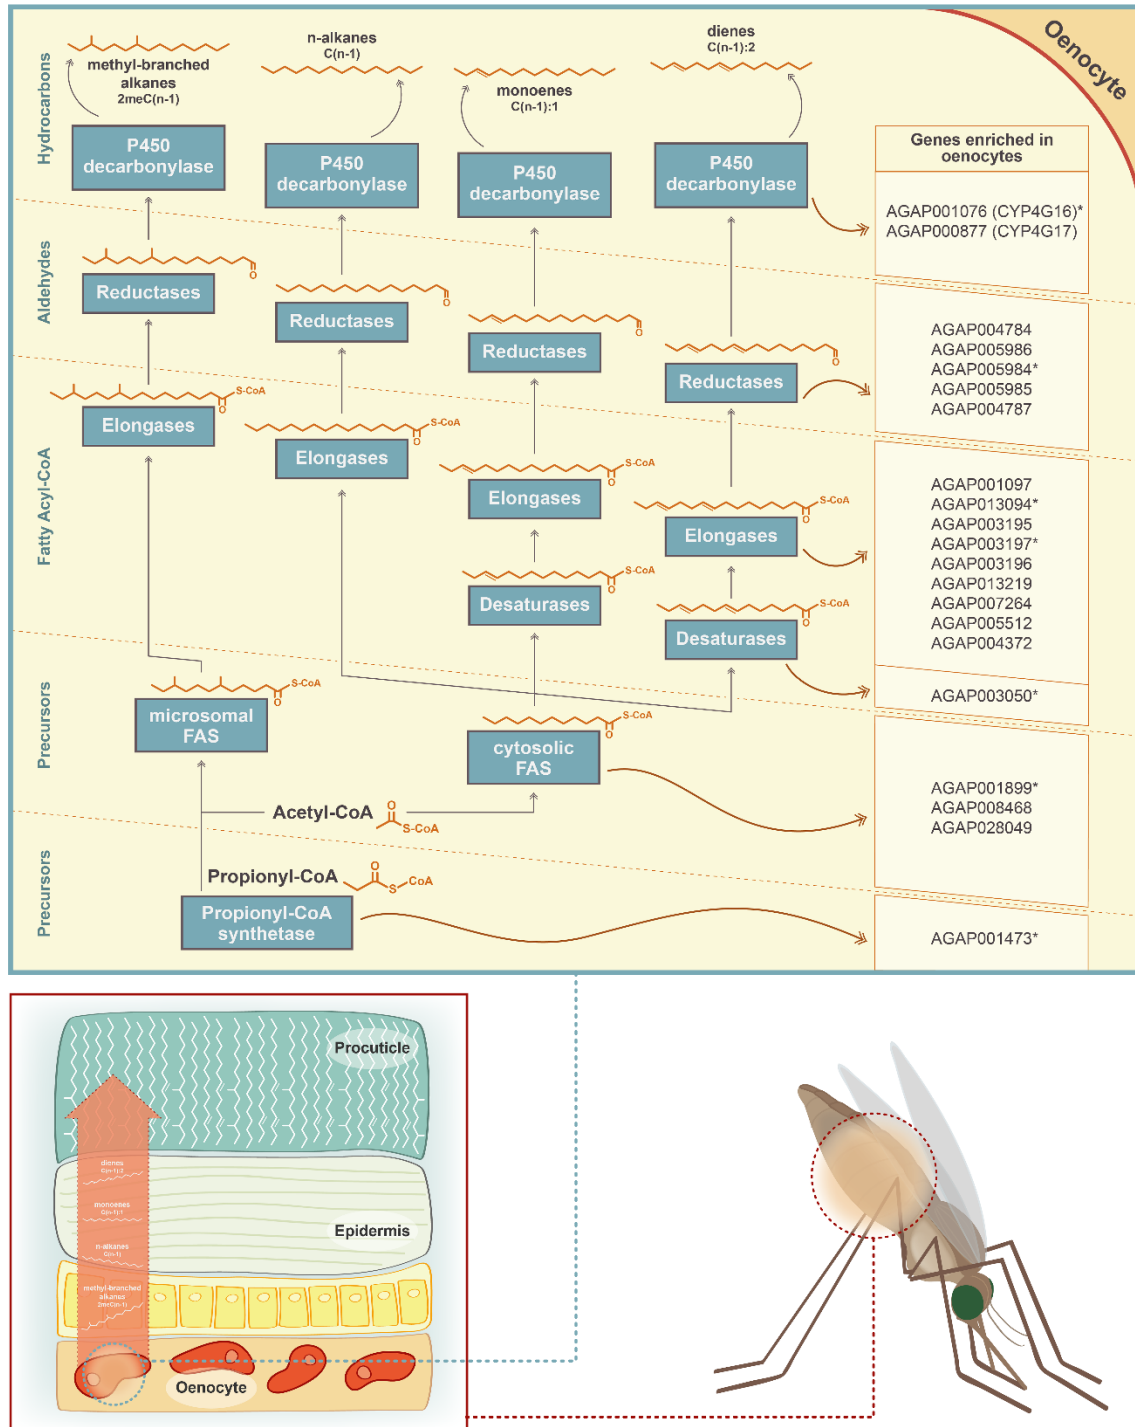

187

188 **Figure 2:** Schematic representation of the CHC biosynthetic pathway (adapted from (Chung and  
 189 Carroll, 2015)). Gene families implicated in the pathway (propionyl-synthetases, fatty acid synthases  
 190 FAS, elongases, desaturases, fatty acid reductases and decarbonylases) are depicted in blue boxes.  
 191 The chemical structure of the two precursor molecules of the pathway (Acetyl-CoA and Propionyl-  
 192 CoA) is shown, as well as the chemical structure of the product of each step of the pathway. Candidate  
 193 genes for each step of the pathway, with enriched expression in *An. gambiae* oenocytes, are listed on  
 194 the left. Genes with an asterisk are members of the Cyp4G16 correlation network (Ingham et al., 2018)

195

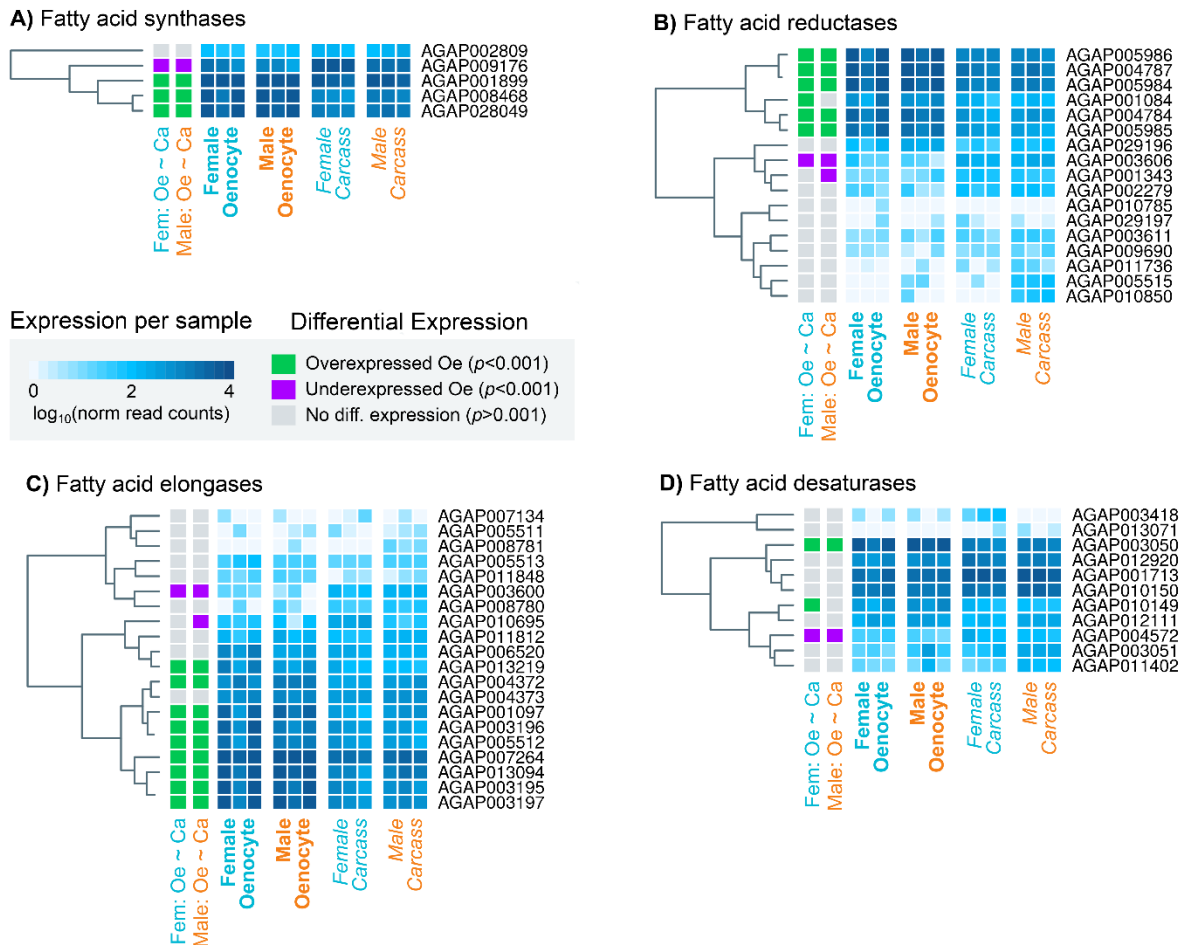

196

197 **Figure 3:** Heat maps showing the expression levels of all *An. gambiae* genes belonging to the four gene  
 198 families (fatty acid synthetases, elongases, desaturases, reductases) implicated in CHC biosynthesis.  
 199 Expression levels (presented as different intensities of blue and using the  $\log_{10}$  of the normalized read  
 200 counts) are shown for all 12 samples used in the RNAseq experiment. The differential expression  
 201 status in female and male oenocytes vs female and male total carcass cells is shown on the left of each  
 202 panel. Trees on the left of each map are based on similarities in gene expression. Source data:  
 203 Supplementary Files 1 and 3.

204

205

### 206 Sex specific differential expression analysis of oenocyte expressed genes.

207 We next compared the transcription profile of isolated oenocytes from female versus male  
 208 mosquitoes. Out of 216 genes that were differentially expressed, 72 were over-expressed in  
 209 female oenocytes and 144 in male oenocytes. Three genes expressing cuticular proteins  
 210 (CPR130, CPR25 and CPR26) were significantly and highly ( $\log_2FC > 3.9$ ) over-expressed in  
 211 female oenocytes. However, with the strict criteria we used for the differential expression  
 212 analysis ( $\log_2FC > 1$ , BH adjusted  $p$ -value  $< 0.001$  in all three replicates) we did not find any gene  
 213 belonging to the hydrocarbon biosynthetic gene families to be differentially expressed  
 214 between sexes (Supplementary file 3).



215

## 216 **Phylogenetic relationships of *An. gambiae* genes implicated in CHC biosynthesis**

217 Phylogenetic trees were constructed for the *An. gambiae*, *Ae. aegypti* and *D. melanogaster*  
218 gene families of fatty acid synthases, elongases, desaturases and reductases to provide  
219 further insights into gene function, in cases where *Drosophila* orthologs have been  
220 characterised, and to identify priority candidates for further study in all three species.

221 The fatty acid synthases AGAP001899 and AGAP009176 cluster closely with three *Drosophila*  
222 FAS genes (Figure 4A and Supplementary Figure 4), two of which have been shown by *in situ*  
223 hybridization to be expressed in oenocytes (Chung et al., 2014). AGAP001899 is  
224 phylogenetically closest to CG17374 (FASN3) known to be expressed in *Drosophila* oenocytes  
225 whereas AGAP009176, the only *An. gambiae* FAS down-regulated in oenocytes, is most  
226 closely related to CG3523 (FASN1), which is expressed in the *Drosophila* fat body.

227 AGAP003050 is the only desaturase enriched in both female and male oenocytes and is a  
228 clear 1:1 ortholog of *D. melanogaster* CG15531 (Figure 4B and Supplementary Figure 5) with  
229 a predicted stearyl-CoA 9-desaturase activity, and AAEL003611 (also found expressed in *Ae.*  
230 *aegypti* oenocytes (Martins et al., 2011)). AGAP001713 and AGAP012920, the paralog of the  
231 three *Drosophila* desaturases Desat1 (CG5887), Desat2 (CG5925) and Fad 2 (CG7923) involved  
232 in the production of unsaturated hydrocarbons (Dallerac et al., 2000, Chertemps et al., 2006),  
233 some of which act as pheromones, were not among the oenocyte enriched genes.

234 The elongase family appears to have radiated further after evolutionary separation of  
235 *Drosophila* and mosquitoes. Five out of the nine *An. gambiae* elongases that are enriched in  
236 oenocytes (Figure 4C and Supplementary Figure 6), (AGAP001097, AGAP003195,  
237 AGAP003196, AGAP003197, AGAP013219) form a cluster of paralogs phylogenetically related  
238 to a single *Drosophila* elongase, CG6660, a gene over-expressed in adult oenocytes (Huang et  
239 al., 2019). Two of these paralogs (AGAP003196 and AGAP013219) are closely related to the  
240 *Ae. aegypti* AAEL013542 elongase, which is also expressed in pupae oenocytes (Martins et al.,  
241 2011). AGAP013094, another oenocyte enriched elongase is the single *An. gambiae* gene in a  
242 cluster of *D. melanogaster* paralogs with known functions in CHC biosynthesis, such as eloF  
243 (CG16905) (Chertemps et al., 2007), CG30008, CG18609 and CG9458 (Dembeck et al., 2015).

244 Contrary to the other gene families, most fatty acid reductases enriched in oenocytes did not  
245 have clear orthology relationships with functionally characterised *D. melanogaster* genes  
246 (Figure 4D and Supplementary Figure 7). For example, AGA005984, AGA005985 and  
247 AGA005986 clustered in a culicine-specific group of paralogs with no *Drosophila* orthologs.  
248 Similarly, most of the fly genes that are functionally linked to CHC profiles (Dembeck et al.,  
249 2015), such as CG13091, CG10097, CG17562 and CG18031, form a cluster of paralogs with no  
250 one-to-one orthologs in *An. gambiae*.

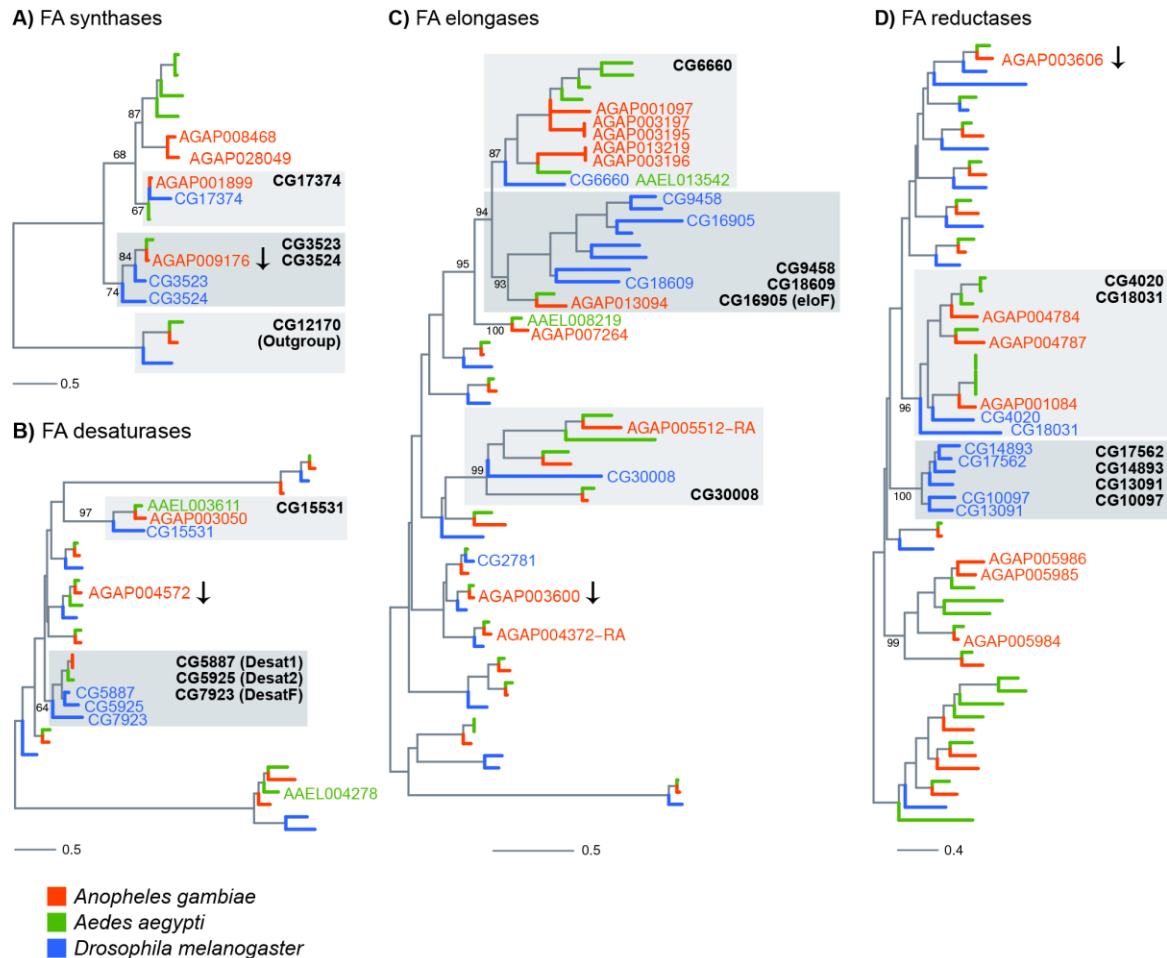

**Figure 4:** Phylogenetic trees constructed for *Anopheles gambiae*, *Aedes aegypti* and *Drosophila melanogaster* genes using the protein domains of Fatty acid synthases (PF00109), desaturases (PF00487), elongases (PF01151) and Fatty acyl-CoA reductases (PF07993). Genes named on trees are all *An. gambiae* genes found enriched in adult oenocytes (with the exception of genes followed by an arrow, which were significantly down-regulated), *Ae. aegypti* genes found expressed in pupae oenocytes and *D. melanogaster* genes expressed in oenocytes and/or functionally validated (based on provided references). Grey boxes have been added to clades that are discussed in the text and named based on the *D. melanogaster* members. Scale bars show the number of amino acid substitutions per alignment position. Trees with all gene names are provided in Supplementary figures 4-7.

## Functional validation of candidate genes

The fatty acid synthase, FAS1899 and the desaturase, Desat3050, both of which were significantly enriched in oenocytes, were selected for functional validation. We knocked-down their expression through oenocyte specific RNAi and examined the effect on the CHC profile.

Firstly UAS-regulated responder lines carrying *FAS1899* and *Desat3050* hairpin RNAi constructs were established. Crossing the responder lines with the oenocyte specific-Gal4 promoter line (Oeno-Gal4) (Lynd et al., 2019) resulted in ~80% knock down for the FAS1899 and ~26% for the Desat3050 (in L2 larvae). In both cases oenocyte specific RNAi suppression

271 was lethal at the L2/L3 larvae stages. Subsequently we crossed the two responder lines with  
272 the Ubi-A10 Gal4 line (marked by CFP) (Adolfi et al., 2018) which directs widespread tissue  
273 expression, but at lower levels in oenocytes compared to the oeno-Gal4 line. The majority of  
274 progeny from these crosses expressing dsRNA for FAS1899 and Desat3050 reached the pupae  
275 stage, but 70-80% died either as mid to late pupae or during adult emergence (Supplementary  
276 Figure 8). QPCR analysis in whole adults indicated a ~26% knock down of FAS1899 transcripts,  
277 but no significant difference in Desat3050 knockdown.

278 GC-MS analysis of the hexane extracted hydrocarbons revealed the presence of at least 60  
279 CHC peaks in all samples; 15 of which were alkanes, 5 unsaturated alkanes and 40 methyl-  
280 branched alkanes. While 19 of the CHC peaks had an abundance of  $\geq 1\%$ , the alkanes C29, C27  
281 and C31, and the methyl-branched methyl-C31 were consistently among the most abundant  
282 accounting for approximately half of the total CHCs (Supplementary File 4).

283 The CHC profile of surviving FAS1899 and Desat3050 knock down adults was compared to  
284 control siblings. A significant (Student's t-test p-value  $\leq 0.05$ ) 25% reduction in the total  
285 amount of hydrocarbons was observed in both female and male FAS1899i mosquitoes. The  
286 proportion of the different CHC categories also changed significantly (Student's t-test p-value  
287  $\leq 0.05$ ) in the FAS1899i individuals, as the relative abundance of methyl-branched  
288 hydrocarbons decreased while the relative abundance of unsaturated and n-alkanes  
289 increased (Figure 5). No difference in the total amount of CHCs, nor of the % of unsaturated  
290 CHCs, was observed for the surviving Desat3050 knock down adults.

291

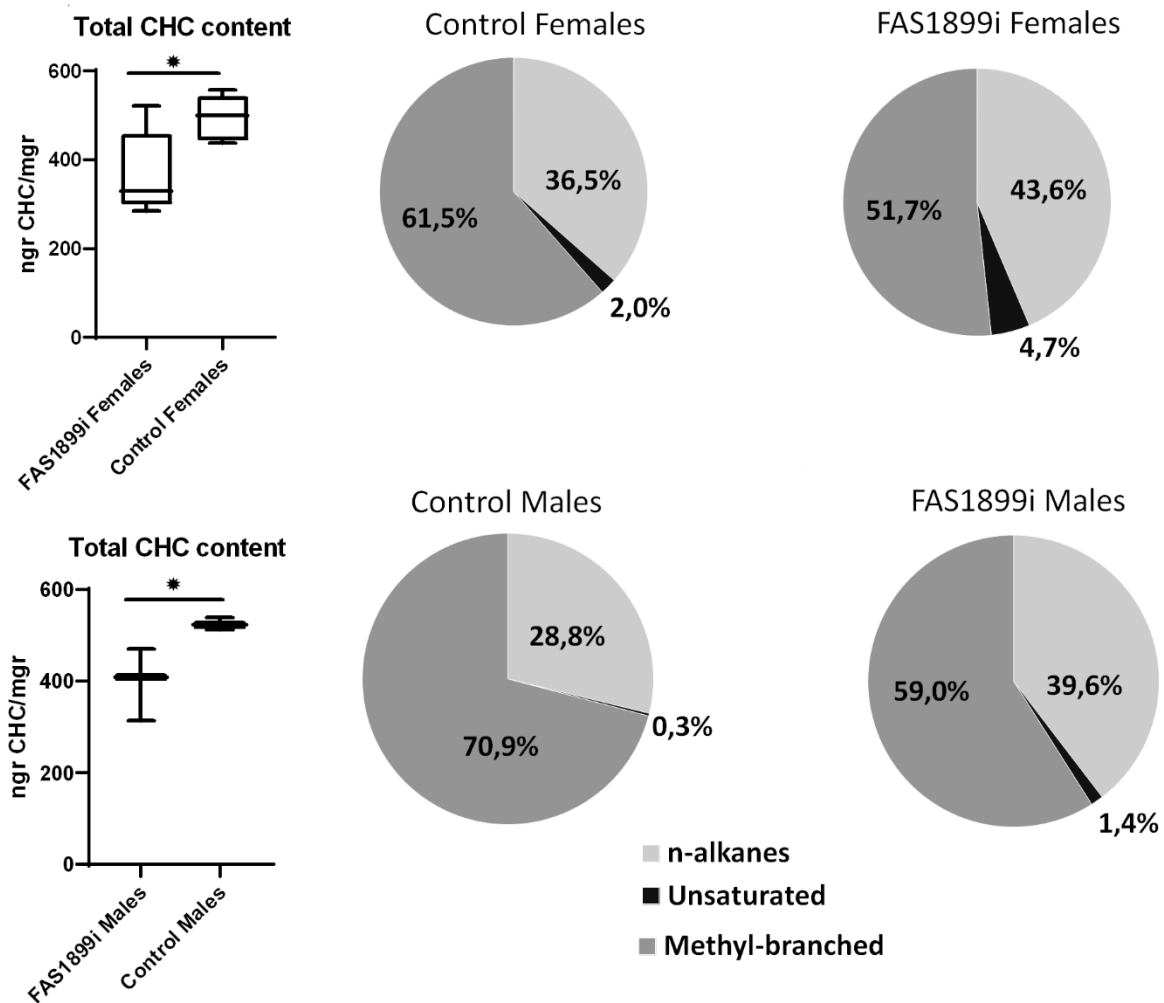

292

293 **Figure 5:** Comparison of the total CHC content quantified with GC-MS in female and male adults with  
294 knock down of FAS1899 (Ubi-A10 Gal4/UAS-FAS1899i) and control siblings (heterozygous Ubi-A10  
295 Gal4/+). The mean values of total CHC/mgr ( $\pm$ SEM) are: for FAS1899i females 368ngr/mgr, for control  
296 females 494ngr/mgr, for FAS1899i males 398ngr/mgr and for control males 525ngr/mgr (5 biological  
297 replicates for females and 3 for males). The box plots show the 25th and 75th percentile; the mean is  
298 shown as a black line within the box; error bars correspond to the minimum and maximum values. Pie  
299 charts represent the relative abundance of the three CHC categories (n-alkanes, unsaturated alkanes  
300 and methyl-branched alkanes) in FAS1899i and control individuals. Statistical test performed:  
301 Student's t-test ( $p$ -value  $\leq 0.05$ ), Source data and  $p$ -values provided in Supplementary File 4.

302

### 303 Discussion

304 CHCs affect key traits in *Anopheles* mosquitoes that determine their fitness and thus vectorial  
305 capacity. The difficulties in isolating the CHC synthesizing cells in adult mosquitoes, due to  
306 their close association with fat body cells within the abdomen, and the absence of clear one  
307 to one orthologs with *Drosophila* in some families (Figure 4), has hindered the identification  
308 of genes involved in mosquito CHC production. In this study we describe the FACS purification  
309 of fluorescently tagged oenocytes from adult *An. gambiae* mosquitoes, and the subsequent

310 transcriptomic analysis of the purified cells which enabled us to identify key candidate genes  
311 in the CHC biosynthetic pathway.

312 The samples analysed consisted of total cells recovered from dissected abdomen integument,  
313 containing ~12% of tagged oenocyte cells, which were then compared to purified oenocyte  
314 cells isolated by passage through the FACS. The abdomen tissue is mainly composed of fat  
315 body and epithelial cells, neither of which are expected to synthesize hydrocarbons. Fat  
316 bodies do however have a primary role in lipid biosynthesis, which has several steps in  
317 common with the CHC biosynthetic pathway, both utilising fatty acid synthases, elongases  
318 and desaturases. The analysis pathway was purposively designed to reveal genes and  
319 isoforms that are predominantly enriched in oenocytes and thus likely to be involved in CHC  
320 biosynthesis but a limitation, in our goal to delineate the entire CHC pathway, is that it will  
321 likely fail to detect genes that are expressed at similar levels in fat bodies and oenocytes and  
322 are involved in both CHC and lipid biosynthesis (Wicker-Thomas et al., 2015).

323 Our data set is the first transcriptomic data for adult mosquito oenocytes. Limited depth  
324 transcriptional analysis of larval *Ae. aegypti* oenocytes that persist during early pupal  
325 development, and are relatively easily dissected in pure form due to their distinct large size  
326 and loose attachment as clumps of cells to the integument (Makki et al., 2014), has previously  
327 been performed (Martins et al., 2011). Comparison of the partial oenocyte *Aedes*  
328 transcriptome with our adult *Anopheles* oenocyte data set provides insights into key genes  
329 potentially involved in CHC synthesis throughout development. Seven genes involved in lipid  
330 biosynthesis were detected in *Aedes* larval oenocytes, including one acetyl-coA synthetase  
331 (AAEL007283), two elongases (AAEL008219 and AAEL013542), two desaturases (AAEL003611  
332 and AAE004278) and the two orthologs of Cyp4G16 and Cyp4G17 (AAEL004054 and  
333 AAEL006824). Clear orthologs for five of these larval oenocyte expressed genes (except for  
334 the desaturase AAEL004278) were present in our *An. gambiae* adult oenocyte transcriptome  
335 (Figure 4). Further work to characterise *Anopheles* oenocyte transcriptomes at earlier life  
336 stages will be facilitated by this FACS approach to enable functional analysis of these cells  
337 during mosquito development.

338 In addition to genes involved in lipid and hydrocarbon biosynthesis, genes associated with the  
339 biological processes of synaptic vesicle coating and docking, and nerve impulse transmission  
340 were found enriched in the oenocyte transcriptome. The Oeno-Gal4 driver line used to  
341 generate the mosquito population with fluorescent oenocytes has a red fluorescent marker  
342 (dsRed) under the control of the 3xP3 promoter that drives expression in the eyes and nerve  
343 cord. A small contamination of the FACS isolated oenocytes with cells of the nerve cord could  
344 be speculated, although nerve cells were not observed when visually observing the isolated  
345 cells with confocal microscopy. Moreover, oenocytes have been reported to play a role in the  
346 neuronal processes during *D. melanogaster* embryogenesis through the secretion of  
347 semaphorin (Sema2a), a peptide that drives axon elongation; ablation of oenocytes results in  
348 sensory axon defects similar to the *sema2a* mutant phenotype (Bates and Whittington, 2007).

349 We functionally validated the role of the fatty acid synthase FAS1899 in CHC biosynthesis, by  
350 stably knocking down its expression during mosquito development. Oenocyte specific knock  
351 down of FAS1899 was lethal at the L2/L3 larvae stages, showing its important role for the

352 normal mosquito development, possibly by synthesizing Very Long Chain Fatty Acids (VLCFA)  
353 that are utilized at the larvae stage either for waterproofing the respiratory system (Parvy et  
354 al., 2012) or for other metabolic purposes. Lethality was also reported for the RNAi-mediated  
355 knock down of its ortholog (CG17374) in *D. melanogaster* before adult eclosion (Chung et al.,  
356 2014). Silencing of the FAS1899 expression using the polyubiquitin (Ubi) promoter also  
357 resulted in high levels of mortality (70-80%), but this time at the pupae stage and during adult  
358 emergence. This milder phenotype could be explained by the fact that the Ubi promoter  
359 drives lower levels of expression in oenocytes, which is supported also by the quantitative  
360 real time PCR data (26% knock down of the FAS1899 in adult progeny of the UAS-FAS1899i x  
361 Ubi-A10 Gal4 cross compared to the 70% of knock down seen in L2/L3 progeny of the UAS-  
362 FAS1899i x Oeno-Gal4 cross).

363 The relative expression levels of FAS1899 affect both the quantity and composition of CHCs  
364 produced in adult oenocytes. A 25% reduction in the total amount of hydrocarbons was  
365 observed for adults surviving knock down of FAS1899 and the CHC profile showed a decrease  
366 in the total proportion of methyl branched CHCs and an increase in saturated chains. Silencing  
367 Cyp4G16 or Cyp4G17 transcript levels in *An. gambiae* oenocytes by approximately 90 %  
368 resulted in high mortality in late pupae, pharate adults and during adult emergence and, in  
369 surviving adults, a 50% reduction in the total amount of CHCs was observed (Lynd et al., 2019).  
370 The Cyp4G16 and Cyp4G17 P450s catalyse the final decarbonylation step in the cuticular  
371 hydrocarbon synthetic pathway, while FAS1899 is thought to catalyse the first step using  
372 acetyl-CoA to generate and elongate a fatty acyl-CoA chain. Thus, perturbing both extremes  
373 of the pathway can influence the final amount of synthesized hydrocarbons.

374 Partial knock down of the Desat3050 transcripts in larval oenocytes was correlated with larval  
375 lethality, similar to FAS1899 knock down. High levels of mortality were also observed when  
376 using the weaker oenocyte (but more widespread driver line). However, no qualitative or  
377 quantitative differences in the CHC profile were observed in surviving adults. Further work is  
378 required, but it may indicate that Desat3050 catalyses the formation of unsaturated lipids  
379 that are not converted to hydrocarbons but are important in development, such that even a  
380 slight perturbation in the expression levels of this gene can have severe developmental effect.

381 Variations in the relative abundance of CHCs on the cuticular surface have been correlated in  
382 *Anopheles* mosquitoes with species, karyotype, age and mating status (Caputo et al., 2005,  
383 Polerstock et al., 2002). Sex specific differences in the relative abundance of some CHC  
384 compounds have also been reported in *An. gambiae* (Caputo et al., 2005), but in contrast to  
385 other insects like *Drosophila melanogaster* (Coyne and Oyama, 1995), sexual dimorphism in  
386 CHCs in mosquitoes has not been reported. This lack of sex specificity is reflected in the  
387 absence of sex specific expression of CHC synthesizing genes in our analysis. However,  
388 interestingly we did identify some splice variants of Cyp4G16, encoding for a different C-  
389 terminus, to be differentially expressed between male and female oenocytes, but further  
390 work is needed to validate this observation. A change in C- terminus is likely to alter the  
391 intracellular location of proteins through removal of the ER retention signal. Previous work  
392 on females has demonstrated enriched localisation of CYP4G16 on the oenocyte plasma

393 membrane surface (Balabanidou et al., 2016). It would be interesting to examine males in  
394 comparison.

395 Variation in the abundance of CHCs has been associated in *An. coluzzii* with insecticide  
396 resistance; a 30% increase in CHC content has been correlated with a decrease in the  
397 penetration rate of pyrethroid insecticides (Balabanidou et al., 2016). Several of the genes  
398 implicated in CHC biosynthesis from the results of the current study are expressed at elevated  
399 levels in pyrethroid resistant mosquitoes and may provide useful genetic markers for  
400 detecting this emerging resistance phenotype. For example FAS1899 is a member of the  
401 Cyp4G16 correlation network and is over-expressed in pyrethroid insecticide resistant *An.*  
402 *gambiae* and *An. coluzzii* populations from Burkina Faso and Côte d'Ivoire (data from the IR-  
403 TEx web-based application (Ingham et al., 2018)). Thus, this gene could be implicated in  
404 cuticular resistance, through the production of a thicker cuticle with more hydrocarbons.

405 In addition to insecticide exposure, environmental factors can also select for changes in the  
406 CHC profile; relative proportions of unsaturated and methyl-branched CHCs altered following  
407 exposure to arid conditions in the insectary (Reidenbach et al., 2014). The pleiotropic effect  
408 of alterations in CHC composition has important implications. Selection pressures that alter  
409 the CHC composition, for example the extensive use of insecticides, or an increase in aridity  
410 due to climate change, could have multiple effects on mosquito fitness and impacts on  
411 disease transmission. Investigating how the different traits influence one another and how  
412 this is regulated by the CHC composition is a key next step to understand how mosquitoes  
413 adapt and survive in a changing environment and in response to disease control interventions.

414

## 415 **Materials and Methods:**

### 416 **Mosquito rearing and preparation of samples for FACS.**

417 *An. gambiae* mosquitoes were reared at 28 °C under 80% humidity and at a 12/12-h day/night  
418 cycle. Larvae were fed with fish food (TetraMin, Tetra GmbH), and adult mosquitoes were fed  
419 ad libitum with 10% sugar. To generate mosquitoes with fluorescent oenocytes we crossed  
420 males from the UAS-mCD8: mCherry responder line (Adolfi et al., 2018) with virgin females of  
421 the oeno-Gal4 driver line (Lynd et al., 2019). Adult progeny (2-4 days old) were collected,  
422 anaesthetised on ice and dissected in 1X PBS. The head, thorax and internal tissues (midgut,  
423 malpighian tubules and reproductive tissues) were removed and the remaining integument  
424 (carcass) was cut open. Each sample (N=12 in total, Supplementary Table 1) consisted of 30  
425 carcasses. Samples were washed twice with 1X PBS and incubated for 30min at 37°C with  
426 0,25% trypsin in 1X PBS. After incubation tissues were washed twice with 1X PBS and  
427 homogenised by pipetting up and down in 1X PBS containing 1% fetal bovine serum.  
428 Dissociated cells were filtered through a plastic filter mesh (ThermoFisher 70µm Nylon Mesh).  
429 For samples used to isolate oenocytes (N=6), cells were immediately used for FACS sorting. In  
430 the case of total carcass cells (N=6) total RNA was extracted after filtering using the Arcturus  
431 PicoPure RNA extraction kit.

### 432 **FACS and RNA sequencing**

433 For oenocyte isolation the BD ARIA III Cell Sorter (BD Biosciences) equipped with lasers at 405  
434 and 561nm was used. Cells were gated based on the m-Cherry fluorescence. A sample of cells  
435 from wild type G3 mosquitoes with no fluorescence was used as control to define the  
436 threshold of fluorescence for isolation. All samples were acquired in Facsdiva software version  
437 8.1 (BD Biosciences). All debris doublets were removed from the analysis. The purity of  
438 isolation was initially assessed by visualization of isolated cells. Oenocytes were directly  
439 sorted in the extraction buffer of the Arcturus PicoPure RNA extraction kit. Total RNA was  
440 extracted based on the manufacturer's instructions, including treatment with DNase.  
441 Generation and amplification (11 cycles) of c-DNA from all samples was done in the Center  
442 for Genome Research (University of Liverpool) using the SMART-Seq<sup>®</sup> v4 Ultra<sup>®</sup> Low Input  
443 RNA Kit, according to manufacturer's instructions. The cDNA samples were purified using  
444 AMPure XP beads (Beckman Coulter) and their concentration and quality determined using  
445 the Agilent 2100 Bioanalyzer and Agilent's High Sensitivity DNA Kit. Libraries were constructed  
446 with a total of 1ng of Smarter amplified material and amplified using 12 cycles of PCR. Quality  
447 control was performed by running 1 µl undiluted library on an Agilent Technology 2100  
448 Bioanalyzer using a High Sensitivity DNA kit. Samples were run on a Illumina HiSeq 4000.

#### 449 **Pre-processing of transcriptome data**

450 Illumina adapter sequences were removed from the read files (24 *fastq* files in total: 12 RNA-  
451 seq runs with right and left reads) using *cutadapt* 1.2.1 (Martin, 2011) (flag *-O 3*). Low-quality  
452 reads were removed using *Sickle* 1.200 (minimum window quality score of Phread = 20,  
453 removing reads shorter than 20bp)(Joshi and Fass, 2011), retaining only read pairs in which  
454 both left and right reads passed quality filters. These steps were performed by the Liverpool  
455 University CGR sequencing facility. Each read file was analysed with *fastqc* 0.11.5 (Andrews,  
456 2014) to confirm the absence of adapters sequences. Overall, 97.12% of reads passed the  
457 quality control process (Supplementary Table 1).

458

#### 459 **Genome data download**

460 The reference gene annotation and assembly of *An. gambiae* was obtained from VectorBase  
461 (Giraldo-Calderon et al., 2015) (GFF and FASTA formats, version AgamP4.9).

#### 462 **Gene functional annotations**

463 We obtained the predicted peptides of each gene using *gffread* (Geo, 2019). Then, we  
464 annotated their Gene Ontology functional annotations using *eggNOG mapper* 1.0.3 (Huerta-  
465 Cepas et al., 2017) (HMM mode, which uses *hmmscan* from *HMMER* 3.2.1 (HMMER 2015))  
466 with the euNOG database of eukaryotic protein annotations (Huerta-Cepas et al., 2016)  
467 (eggNOG version 4.5) as a reference. In parallel, we annotated the protein domains using  
468 Pfamscan, based on version 31 of the Pfam database (Punta et al., 2012).

#### 469 **Analysis of differential expression**

470 We quantified gene expression using the trimmed, clean reads. Specifically, we used *Salmon*  
471 0.10.2 (Patro et al., 2017) to build an index of transcripts (*salmon index*; using the longest



472 isoform per gene as a reference), using the quasi-mapping procedure (*--type quasi* flag) and  
473 k-mers of length 31 (*-k 31*); and then quantified transcript abundance (*salmon quant*) in each  
474 sample using the paired-end read files (using automated library type inference, *-l A* flag), in  
475 order to obtain TPM (transcripts per million) values for each gene.

476 Then, we performed a differential expression analysis between sample groups (female  
477 oenocytes vs female carcass cells, male oenocytes vs male carcass cells and female oenocytes  
478 vs male oenocytes) using the R *DESeq2* library 1.24.0 (Love et al., 2014). First, we imported  
479 the transcript quantification values from *Salmon* (see above) using the *tximport* library 1.12.0  
480 (Soneson et al., 2015). Then, we performed targeted differential expression analyses between  
481 groups of samples using the *DESeq* function from *DESeq2* (using the Wald procedure for  
482 significance testing), produced a table of normalised gene counts per sample using the *counts*  
483 function (using *DESeq2* normalisation factors), and obtained the fold changes and *p*-values  
484 from a Wald test for each gene, using the *results* command (using a Benjamini-Hochberg [FDR]  
485 *p*-value correction (Benjamini and Hochberg, 1995) and an alpha threshold = 0.001, and all  
486 combinations of samples from Supplementary Table 1 to define the *contrast* parameter). The  
487 log-fold change values were corrected (shrunk) with *lfcShrink* and the *apeglm* algorithm  
488 (Zhu et al., 2019). We defined a gene as being differentially expressed in a given comparison  
489 if the adjusted *p* < 0.001 and the absolute shrunk log-fold change > 1 (i.e. absolute fold  
490 change > 2).

491 We explored the variation in gene expression across samples using the normalised gene  
492 counts (log-transformed, and standardized to mean = 0 and standard deviation = 1 using the  
493 *scale* R function). First, we performed a Principal Components analysis (PCA) using the  
494 normalised gene counts of each sample (*prcomp* function of the R *stats* library).

#### 495 **Heatmaps of gene expression for selected genes**

496 To visualise changes in expression for genes involved in CHC biosynthesis, we produced  
497 heatmaps of gene expression by plotting the normalised gene counts of each gene in each  
498 sample (*pheatmap* function from the *pheatmap* 1.012 R library (Kolde 2019), using Pearson  
499 correlation values to set the order of genes).

#### 500 **Analysis of alternative splicing**

501 We used *SUPPA2* (Trincado et al., 2018) to generate a set of alternative splicing events from  
502 the annotated isoforms in the *An. gambiae* genome (GFF file from Vectorbase, AgamP4.9),  
503 using the *generateEvents* mode to detect retained introns, skipped exons, and alternative first  
504 or last exons, and mutually exclusive exons (*-e SE MX RI SS FL*), with 10bp as the minimum  
505 exon length (*-l 10*). We also calculated the expression levels at the isoform level using *Salmon*  
506 0.10.2 (Patro et al., 2017) (output in TPM). Then, we used *SUPPA2 psiPerIsoform* mode to  
507 calculate the inclusion rates of each isoform (PSI: percentage spliced-in) in each sample, using  
508 the expression levels of each isoform (obtained from *Salmon*) as a reference. Differential  
509 splicing was quantified by calculating the average difference in PSI values  
510 between each sample group (male/female oenocytes and carcasses), and *p*-values were  
511 obtained using the empirical significance calculation method described in *SUPPA2* (Trincado  
512 et al., 2018).

513 The PSI values of selected differentially spliced genes ( $p < 0.05$ ) belonging to the biosynthesis  
514 pathway were reported using a heatmap table (*pheatmap* function from the *pheatmap* 1.012  
515 R library).

516

### 517 **Gene functional enrichment analysis**

518 Gene Ontology enrichments based on the GOs annotated with *eggNOG* mapper (see above)  
519 were computed using the *topGO* R library (2.34) (Alexa and Rahnenfuhrer 2018). Specifically,  
520 we computed the functional enrichments based on the counts of genes belonging to the  
521 group of interest relative to all annotated genes, using Fisher's exact test and the *elim*  
522 algorithm for GO graph weighting (Alexa et al., 2006).

523 Functional enrichment tests of Pfam domain annotations were performed using  
524 hypergeometric tests as implemented in the R stats 3.6 library (*phyper*) (R Core Team 2017),  
525 comparing the frequencies of presence of Pfam domains in a list of genes of interest to the  
526 same frequencies in the whole gene set (using unique domains per gene). We adjusted  $p$   
527 values using the Benjamini-Hochberg procedure.

### 528 **Construction of phylogenetic trees**

529 We retrieved genes belonging to gene family-members of the fatty acid biosynthesis pathway  
530 from the proteomes of *An. gambiae* (Vectorbase, AgamP4.9 annotation), *Ae. aegypti*  
531 (Vectorbase LVP\_AGWG AaegL5.1 annotation) and *D. melanogaster* (Flybase r6.21  
532 annotation). Specifically, we defined the list of candidate genes for phylogenetic analysis  
533 according to the presence of the following catalytic Pfam domains: FA\_desaturase (PF00487)  
534 for desaturases (totalling 29 individual domains), ELO (PF01151) for elongases (62),  
535 NAD\_binding\_4 (PF07993) for reductases (61), ketoacyl-synt (PF00109) for synthases (16).  
536 Pfam annotations were obtained from Pfamscan as described above. Functional domain  
537 sequence sets were aligned using *MAFFT* 7.310 (1,000 rounds of iterative refinement, L-INS-i  
538 algorithm)(Kato and Standley, 2013), and later trimmed position-wise using *trimAL* 1.4  
539 (*automated1* procedure)(Capella-Gutierrez et al., 2009). The trimmed alignments were used  
540 to build maximum-likelihood phylogenetic trees for each gene family, using *IQ-TREE*  
541 1.6.10(Nguyen et al., 2015). The best-fitting evolutionary model (LG substitution matrix (Le  
542 and Gascuel, 2008) with four  $\Gamma$  categories and accounting for invariant sites, or LG+I+G4) was  
543 selected for each gene family according to the BIC criterion. Phylogenetic statistical supports  
544 were calculated using the UF bootstrap procedure (1,000 replicates) (Hoang et al., 2018).

545 The resulting phylogenetic trees were mid-point rooted using the *R* phangorn 2.53 library  
546 (Schliep, 2011), and visualisations were produced using the *phytools* 0.6-60 (Revell, 2012) and  
547 *ape* 5.3 libraries (*plot.phylo*)(Paradis and Schliep, 2019).

### 548 **Plasmid construction and generation of the UAS FAS1899RNAi responder line by PhiC31-Mediated Cassette Exchange**

550 A UAS responder plasmid was generated for the expression of dsRNA targeting the third exon  
551 of the AGAP001899 gene. Specifically 200bp inverted repeats separated by the 203bp fourth

552 intron of the *Drosophila melanogaster* white eye gene (CG2759) were synthesized by  
553 GeneScript and cloned into the YFP-marked responder plasmid  
554 pSL\*attB:YFP:Gyp:UAS14i:Gyp:attB (Lynd et al., 2019) downstream of the UAS using  
555 EcoRI/NheI restriction enzymes. The intron of the *Drosophila* white eye gene was used  
556 because all internal introns of the AGAP001899 gene were shorter than 100bp, making the  
557 synthesis of the 200bp inverted repeats impossible. Embryo injections were performed using  
558 the A11 docking line (Lynd et al., 2019), which carries 2 inverted attP sites and is marked with  
559 3xP3-driven CFP. 350 ng/μL of the responder plasmid and 150 ng/μL of the integrase helper  
560 plasmid pKC40 encoding the phiC31 integrase (Ringrose, 2009) were injected as described in  
561 Pondeville et al. (Pondeville et al., 2014). Emerging F0 individuals were outcrossed with wild  
562 type G3 individuals of the opposite sex. The F1 generation was screened for the expression of  
563 the YFP marker in the eyes and nerve cord and the absence of the CFP marker, indicating the  
564 successful cassette exchange. The direction of the cassette exchange was determined as  
565 described in Adolphi et al. (Adolphi et al., 2019) and shown to be of the A orientation. The FAS1899  
566 RNAi and Desat3050 RNAi responder lines that were established were kept as a mix of  
567 homozygous and heterozygous individuals so as to obtain Gal4/+ progeny after crossing with  
568 the Gal4 driver lines and obtain siblings that serve as transgenic blank controls.

#### 569 **Crosses of transgenic lines and qRT PCR for gene expression analysis**

570 Crosses were performed between the responder lines UAS-FAS1899i, UAS-Desat3050 and the  
571 two Gal4 lines: oenocyte specific-GAL4 (Oeno-Gal4) (Lynd et al., 2019) and Ubi-A10 Gal4 line  
572 (Adolphi et al., 2018). Progeny (at least 10 individuals for each group, pooled in 2-3 biological  
573 replicates) of these crosses, YFP marked and blank (control siblings), were collected either at  
574 the L2-L3 stage (for the cross with the oeno-Gal4 line) or at the adult stage (for the cross with  
575 the Ubi-A10 line) and used to extract RNA with the PicoPure RNA isolation kit (Thermo Fisher  
576 Scientific) and treated with DNase using the Qiagen RNase-free DNase kit. 2μg of RNA were  
577 reverse transcribed using SuperScript III (Invitrogen) and oligo(dT)20 primers to produce  
578 cDNA. Expression of AGAP001899 (FAS1899) and AGAP003050 (Desat3050) was validated by  
579 qPCR using the following primers: (FAS1899 Forward: 5'-AGCGATCTGCGTGATGTACC-3',  
580 FAS1899 Reverse: 5'-GCCTTCCTCCTTAAACCCGTC-3', Desat3050 Forward: 5'  
581 CCGTACTACAGCGACAAGGAC-3', Desat3050 Reverse 5'-GAACATCACAATACCGTCCGC-3') and  
582 reference gene for normalization the Ribosomal S7 (AGAP010592) (Forward: 5'-  
583 AGAACCAGCAGACCACCATC-3' Reverse: 5'-GCTGCAAACCTTCGGCTATTC-3'). Expression  
584 analysis was performed according to Pfaffl, 2001 (Pfaffl, 2001).

585

#### 586 **Extraction of Cuticular Hydrocarbons and analysis with GC-MS**

587 CHCs were extracted from pools of adult (3-5 days old) mosquitoes (each pool consisted of 2-  
588 5 mosquitoes depending on availability, at least 3 pools per condition) by immersing them  
589 and gently agitating them, for 10 min at room temperature, in 200 μl of hexane (Sigma-  
590 Aldrich) spiked with 1ng/ml of octadecane (Sigma-Aldrich) as internal standard. Hexane  
591 extracts were concentrated under a N<sub>2</sub> stream and 2μl injected in a Waters GCT gas

592 chromatograph-mass spectrometer. The GC column was a 30 m long, 0.25 mm internal  
593 diameter, 0.25 µm film thickness BPX5 (SGE). The oven temperature gradient was 50°C to  
594 370°C at 10°C/minute and the carrier gas was helium (BOC) at a flow rate of 1 ml/minute. The  
595 scan range was  $m/z$  40 to 450 Da in scan time 0.9 s. Compounds were identified based on  
596 their mass spectra in comparison to those of an alkane standard mixture (C10-C40, Merck  
597 68281-2ML-F), by comparison of their retention times and fragmentation patterns to  
598 published *Anopheles gambiae* CHC mass spectra (Balabanidou et al., 2016) and searches of  
599 the NIST mass spectrum library supplied with Waters MassLynx software. Peak areas were  
600 measured manually using the peak integration tool in the Waters MassLynx software. The  
601 total amount of hydrocarbon present was calculated by summing all the peak areas measured  
602 relative to the area of the internal standard. Student's t-test was performed for the statistical  
603 analysis of differences in total CHC amount and relative abundance of CHC categories.

604

### 605 **Availability of data and materials**

606 Transcriptome sequencing has been deposited in the European Nucleotide Archive (ENA),  
607 under **PRJEB37240** project. All transgenic lines produced in this study will be provided by L.G  
608 upon request.

609

610 All data and code (in R) required to perform the differential expression, alternative splicing  
611 and phylogenetic analyses in this paper is available in the following Github repository:  
612 <https://github.com/xgrau/oenocytes-agam>

613

### 614 **Acknowledgements**

615 We would like to thank Jesus Reiner (LSTM) for performing the FACS; Mark Prescott and Rob  
616 Beynon (University of Liverpool) who performed the CHC analysis at the Centre for Proteome  
617 Research, University of Liverpool; Simon Wagstaff (LSTM) for his advice on the RNAseq ;  
618 Andriana Adolphi for providing the Ubi-A10 line; Rachel Davies (LSTM) for her assistance with  
619 mosquito rearing, Amalia Anthousi and Fraser Colman (LSTM) for long term maintenance and  
620 provision of stock driver and docking lines and Manuela Bernardi for preparation of figures.  
621 Flow cytometric sorting was performed on a BD FACS Aria III funded by a Wellcome Trust Multi-  
622 User Equipment Grant (104936/Z/14/Z). This study was funded by a Director Catalyst Fund  
623 (pump priming award from LSTM) and a Sir Henry Wellcome Postdoctoral fellowship (Grant  
624 reference number: 215894/Z/19/Z) to L.G.

### 625 **References**

626 ADOLFI, A., PONDEVILLE, E., LYND, A., BOURGOUIN, C. & LYCETT, G. J. 2018. Multi-tissue GAL4-  
627 mediated gene expression in all *Anopheles gambiae* life stages using an endogenous  
628 polyubiquitin promoter. *Insect Biochem Mol Biol*, 96, 1-9.

- 629 ADOLFI, A., POULTON, B., ANTHOUSI, A., MACILWEE, S., RANSON, H. & LYCETT, G. J. 2019. Functional  
630 genetic validation of key genes conferring insecticide resistance in the major African malaria  
631 vector, *Anopheles gambiae*. *Proc Natl Acad Sci U S A*, 116, 25764-25772.
- 632 ALEXA, A., RAHNENFUHRER, J. & LENGAUER, T. 2006. Improved scoring of functional groups from  
633 gene expression data by decorrelating GO graph structure. *Bioinformatics*, 22, 1600-7.
- 634 ANDREWS, S. 2014. FastQC. <http://www.bioinformatics.bbsrc.ac.uk/projects/fastqc>
- 635 ARCAZ, A. C., HUESTIS, D. L., DAO, A., YARO, A. S., DIALLO, M., ANDERSEN, J., BLOMQUIST, G. J. &  
636 LEHMANN, T. 2016. Desiccation tolerance in *Anopheles coluzzii*: the effects of spiracle size  
637 and cuticular hydrocarbons. *J Exp Biol*, 219, 1675-88.
- 638 BALABANIDOU, V., GRIGORAKI, L. & VONTAS, J. 2018. Insect cuticle: a critical determinant of  
639 insecticide resistance. *Curr Opin Insect Sci*, 27, 68-74.
- 640 BALABANIDOU, V., KAMPOURAKI, A., MACLEAN, M., BLOMQUIST, G. J., TITTIGER, C., JUAREZ, M. P.,  
641 MIJAILOVSKY, S. J., CHALEPAKIS, G., ANTHOUSI, A., LYND, A., ANTOINE, S., HEMINGWAY, J.,  
642 RANSON, H., LYCETT, G. J. & VONTAS, J. 2016. Cytochrome P450 associated with insecticide  
643 resistance catalyzes cuticular hydrocarbon production in *Anopheles gambiae*. *Proc Natl Acad Sci U S A*, 113, 9268-73.
- 645 BATES, K. E. & WHITINGTON, P. M. 2007. Semaphorin 2a secreted by oenocytes signals through  
646 plexin B and plexin A to guide sensory axons in the *Drosophila* embryo. *Dev Biol*, 302, 522-  
647 35.
- 648 BENJAMINI, Y. & HOCHBERG, Y. 1995. Controlling the False Discovery Rate: A Practical and Powerful  
649 Approach to Multiple Testing. *Journal of the Royal Statistical Society. Series B*, 57, 289-300.
- 650 BHATT, S., WEISS, D. J., CAMERON, E., BISANZIO, D., MAPPIN, B., DALRYMPLE, U., BATTLE, K.,  
651 MOYES, C. L., HENRY, A., ECKHOFF, P. A., WENGER, E. A., BRIET, O., PENNY, M. A., SMITH, T.  
652 A., BENNETT, A., YUKICH, J., EISELE, T. P., GRIFFIN, J. T., FERGUS, C. A., LYNCH, M., LINDGREN,  
653 F., COHEN, J. M., MURRAY, C. L. J., SMITH, D. L., HAY, S. I., CIBULSKIS, R. E. & GETTING, P. W.  
654 2015. The effect of malaria control on *Plasmodium falciparum* in Africa between 2000 and  
655 2015. *Nature*, 526, 207-211.
- 656 BLOMQUIST, G. J., BAGNÈRES, A. G., WICKER-THOMAS, C., CHERTEMPS, T., GIBBS, A., RAJPUROHIT,  
657 S., MILLAR, J., BUCKNER, J. S., OZAKI, M., WADA-KATSUMATA, A., VAN ZWEDEN, J. S.,  
658 D'ETTORRE, P., GREEN, M., LIEBIG, J., LORENZI, C., FERVEUR, J. F., COBB, M., TRABALON, M.,  
659 GINZEL, M. D., BARTELT, R. & HEFETZ, A. 2010. Insect Hydrocarbons Biology, Biochemistry,  
660 and Chemical Ecology.
- 661 CAPELLA-GUTIERREZ, S., SILLA-MARTINEZ, J. M. & GABALDON, T. 2009. trimAl: a tool for automated  
662 alignment trimming in large-scale phylogenetic analyses. *Bioinformatics*, 25, 1972-1973.
- 663 CAPUTO, B., DANI, F. R., HORNE, G. L., PETRARCA, V., TURILLAZZI, S., COLUZZI, M., PRIESTMAN, A. A.  
664 & DELLA TORRE, A. 2005. Identification and composition of cuticular hydrocarbons of the  
665 major Afrotropical malaria vector *Anopheles gambiae* s.s. (Diptera: Culicidae): analysis of  
666 sexual dimorphism and age-related changes. *J Mass Spectrom*, 40, 1595-604.
- 667 CHERTEMPS, T., DUPORTETS, L., LABEUR, C., UEDA, R., TAKAHASHI, K., SAIGO, K. & WICKER-  
668 THOMAS, C. 2007. A female-biased expressed elongase involved in long-chain hydrocarbon  
669 biosynthesis and courtship behavior in *Drosophila melanogaster*. *Proc Natl Acad Sci U S A*,  
670 104, 4273-8.
- 671 CHERTEMPS, T., DUPORTETS, L., LABEUR, C., UEYAMA, M. & WICKER-THOMAS, C. 2006. A female-  
672 specific desaturase gene responsible for diene hydrocarbon biosynthesis and courtship  
673 behaviour in *Drosophila melanogaster*. *Insect Mol Biol*, 15, 465-73.
- 674 CHIANG, Y. N., TAN, K. J., CHUNG, H., LAVRYNENKO, O., SHEVCHENKO, A. & YEW, J. Y. 2016. Steroid  
675 Hormone Signaling Is Essential for Pheromone Production and Oenocyte Survival. *PLoS*  
676 *Genet*, 12, e1006126.
- 677 CHUNG, H. & CARROLL, S. B. 2015. Wax, sex and the origin of species: Dual roles of insect cuticular  
678 hydrocarbons in adaptation and mating. *Bioessays*, 37, 822-30.

- 679 CHUNG, H., LOEHLIN, D. W., DUFOUR, H. D., VACCARRO, K., MILLAR, J. G. & CARROLL, S. B. 2014. A  
680 single gene affects both ecological divergence and mate choice in *Drosophila*. *Science*, 343,  
681 1148-51.
- 682 COYNE, J. A. & OYAMA, R. 1995. Localization of pheromonal sexual dimorphism in *Drosophila*  
683 *melanogaster* and its effect on sexual isolation. *Proc Natl Acad Sci U S A*, 92, 9505-9.
- 684 DALLERAC, R., LABEUR, C., JALLON, J. M., KNIPPLE, D. C., ROELOFS, W. L. & WICKER-THOMAS, C.  
685 2000. A delta 9 desaturase gene with a different substrate specificity is responsible for the  
686 cuticular diene hydrocarbon polymorphism in *Drosophila melanogaster*. *Proc Natl Acad Sci U*  
687 *S A*, 97, 9449-54.
- 688 DEMBECK, L. M., BOROCZKY, K., HUANG, W., SCHAL, C., ANHOLT, R. R. & MACKAY, T. F. 2015.  
689 Genetic architecture of natural variation in cuticular hydrocarbon composition in *Drosophila*  
690 *melanogaster*. *Elife*, 4.
- 691 DILLWITH, J. W., BLOMQUIST, G. J. & NELSON, D. R. 1981. Biosynthesis of the Hydrocarbon  
692 Components of the Sex-Pheromone of the Housefly, *Musca-Domestica* L. *Insect*  
693 *Biochemistry*, 11, 247-253.
- 694 GEO, P. 2019. gffread: GFF/GTF utility providing format conversions, region filtering, FASTA sequence  
695 extraction and more. <https://github.com/gpertea/gffread>
- 696 GIRALDO-CALDERON, G. I., EMRICH, S. J., MACCALLUM, R. M., MASLEN, G., DIALYNAS, E., TOPALIS,  
697 P., HO, N., GESING, S., VECTORBASE, C., MADEY, G., COLLINS, F. H. & LAWSON, D. 2015.  
698 VectorBase: an updated bioinformatics resource for invertebrate vectors and other  
699 organisms related with human diseases. *Nucleic Acids Res*, 43, D707-13.
- 700 HOANG, D. T., CHERNOMOR, O., VON HAESELER, A., MINH, B. Q. & VINH, L. S. 2018. UFBoot2:  
701 Improving the Ultrafast Bootstrap Approximation. *Mol Biol Evol*, 35, 518-522.
- 702 HUANG, K., CHEN, W., ZHU, F., LI, P. W., KAPAHI, P. & BAI, H. 2019. RiboTag translaticomic profiling of  
703 *Drosophila* oenocytes under aging and induced oxidative stress. *BMC Genomics*, 20, 50.
- 704 HUERTA-CEPAS, J., FORSLUND, K., COELHO, L. P., SZKLARCZYK, D., JENSEN, L. J., VON MERING, C. &  
705 BORK, P. 2017. Fast Genome-Wide Functional Annotation through Orthology Assignment by  
706 eggNOG-Mapper. *Mol Biol Evol*, 34, 2115-2122.
- 707 HUERTA-CEPAS, J., SZKLARCZYK, D., FORSLUND, K., COOK, H., HELLER, D., WALTER, M. C., RATTEI, T.,  
708 MENDE, D. R., SUNAGAWA, S., KUHN, M., JENSEN, L. J., VON MERING, C. & BORK, P. 2016.  
709 eggNOG 4.5: a hierarchical orthology framework with improved functional annotations for  
710 eukaryotic, prokaryotic and viral sequences. *Nucleic Acids Res*, 44, D286-93.
- 711 INGHAM, V. A., WAGSTAFF, S. & RANSON, H. 2018. Transcriptomic meta-signatures identified in  
712 *Anopheles gambiae* populations reveal previously undetected insecticide resistance  
713 mechanisms. *Nat Commun*, 9, 5282.
- 714 JOSHI, N. & FASS, J. 2011. Windowed Adaptive Trimming for fastq files using quality.  
715 <https://github.com/najoshi/sickle>
- 716 KATO, K. & STANDLEY, D. M. 2013. MAFFT multiple sequence alignment software version 7:  
717 improvements in performance and usability. *Mol Biol Evol*, 30, 772-80.
- 718 KEFI, M., BALABANIDOU, V., DOURIS, V., LYCETT, G., FEYEREISEN, R. & VONTAS, J. 2019. Two  
719 functionally distinct CYP4G genes of *Anopheles gambiae* contribute to cuticular hydrocarbon  
720 biosynthesis. *Insect Biochem Mol Biol*, 110, 52-59.
- 721 LE, S. Q. & GASCUEL, O. 2008. An improved general amino acid replacement matrix. *Mol Biol Evol*,  
722 25, 1307-20.
- 723 LOCKEY, K. H. 1988. Lipids of the Insect Cuticle - Origin, Composition and Function. *Comparative*  
724 *Biochemistry and Physiology B-Biochemistry & Molecular Biology*, 89, 595-645.
- 725 LOVE, M. I., HUBER, W. & ANDERS, S. 2014. Moderated estimation of fold change and dispersion for  
726 RNA-seq data with DESeq2. *Genome Biol*, 15, 550.
- 727 LYCETT, G. J., MCLAUGHLIN, L. A., RANSON, H., HEMINGWAY, J., KAFATOS, F. C., LOUKERIS, T. G. &  
728 PAINE, M. J. 2006. *Anopheles gambiae* P450 reductase is highly expressed in oenocytes and  
729 in vivo knockdown increases permethrin susceptibility. *Insect Mol Biol*, 15, 321-7.

- 730 LYND, A., BALABANIDOU, V., GROSMAN, R., MAAS, J., LIAN, L. Y., VONTAS, J. & LYCETT, G. 2019.  
731 Development of a functional genetic tool for Anopheles gambiae oenocyte characterisation:  
732 application to cuticular hydrocarbon synthesis. *bioRxiv*, doi:  
733 <https://doi.org/10.1101/742619>.
- 734 LYND, A. & LYCETT, G. J. 2012. Development of the bi-partite Gal4-UAS system in the African malaria  
735 mosquito, Anopheles gambiae. *PLoS One*, 7, e31552.
- 736 MAKKI, R., CINNAMON, E. & GOULD, A. P. 2014. The development and functions of oenocytes. *Annu*  
737 *Rev Entomol*, 59, 405-25.
- 738 MARTIN, M. 2011. Cutadapt removes adapter sequences from high-throughput sequencing reads. .  
739 *EMBnet.journal* 17.
- 740 MARTINS, G. F., RAMALHO-ORTIGAO, J. M., LOBO, N. F., SEVERSON, D. W., MCDOWELL, M. A. &  
741 PIMENTA, P. F. 2011. Insights into the transcriptome of oenocytes from Aedes aegypti  
742 pupae. *Mem Inst Oswaldo Cruz*, 106, 308-15.
- 743 NGUYEN, L. T., SCHMIDT, H. A., VON HAESELER, A. & MINH, B. Q. 2015. IQ-TREE: a fast and effective  
744 stochastic algorithm for estimating maximum-likelihood phylogenies. *Mol Biol Evol*, 32, 268-  
745 74.
- 746 PARADIS, E. & SCHLIEP, K. 2019. ape 5.0: an environment for modern phylogenetics and evolutionary  
747 analyses in R. *Bioinformatics*, 35, 526-528.
- 748 PARVY, J. P., NAPAL, L., RUBIN, T., POIDEVIN, M., PERRIN, L., WICKER-THOMAS, C. & MONTAGNE, J.  
749 2012. Drosophila melanogaster Acetyl-CoA-carboxylase sustains a fatty acid-dependent  
750 remote signal to waterproof the respiratory system. *PLoS Genet*, 8, e1002925.
- 751 PATRO, R., DUGGAL, G., LOVE, M. I., IRIZARRY, R. A. & KINGSFORD, C. 2017. Salmon provides fast and  
752 bias-aware quantification of transcript expression. *Nat Methods*, 14, 417-419.
- 753 PFAFFL, M. W. 2001. A new mathematical model for relative quantification in real-time RT-PCR.  
754 *Nucleic Acids Res*, 29, e45.
- 755 POLERSTOCK, A. R., EIGENBRODE, S. D. & KLOWDEN, M. J. 2002. Mating alters the cuticular  
756 hydrocarbons of female Anopheles gambiae sensu stricto and aedes Aegypti (Diptera:  
757 Culicidae). *J Med Entomol*, 39, 545-52.
- 758 PONDEVILLE, E., PUCHOT, N., MEREDITH, J. M., LYND, A., VERNICK, K. D., LYCETT, G. J., EGGLESTON,  
759 P. & BOURGOUIN, C. 2014. Efficient PhiC31 integrase-mediated site-specific germline  
760 transformation of Anopheles gambiae. *Nat Protoc*, 9, 1698-712.
- 761 PUNTA, M., COGGILL, P. C., EBERHARDT, R. Y., MISTRY, J., TATE, J., BOURSNELL, C., PANG, N.,  
762 FORSLUND, K., CERIC, G., CLEMENTS, J., HEGER, A., HOLM, L., SONNHAMMER, E. L., EDDY, S.  
763 R., BATEMAN, A. & FINN, R. D. 2012. The Pfam protein families database. *Nucleic Acids Res*,  
764 40, D290-301.
- 765 QIU, Y., TITTIGER, C., WICKER-THOMAS, C., LE GOFF, G., YOUNG, S., WAJNBERG, E., FRICAUX, T.,  
766 TAQUET, N., BLOMQUIST, G. J. & FEYEREISEN, R. 2012. An insect-specific P450 oxidative  
767 decarboxylase for cuticular hydrocarbon biosynthesis. *Proc Natl Acad Sci U S A*, 109, 14858-  
768 63.
- 769 REIDENBACH, K. R., CHENG, C., LIU, F., LIU, C., BESANSKY, N. J. & SYED, Z. 2014. Cuticular differences  
770 associated with aridity acclimation in African malaria vectors carrying alternative  
771 arrangements of inversion 2La. *Parasit Vectors*, 7, 176.
- 772 REVELL, L. J. 2012. phytools: an R package for phylogenetic comparative biology (and other things).  
773 *Methods in Ecology and Evolution*, 3, 217-223.
- 774 RINGROSE, L. 2009. Transgenesis in Drosophila melanogaster. *Methods Mol Biol*, 561, 3-19.
- 775 SCHLIEP, K. P. 2011. phangorn: phylogenetic analysis in R. *Bioinformatics*, 27, 592-3.
- 776 SONESON, C., LOVE, M. I. & ROBINSON, M. D. 2015. Differential analyses for RNA-seq: transcript-  
777 level estimates improve gene-level inferences. *F1000Res*, 4, 1521.
- 778 TRINCADO, J. L., ENTIZNE, J. C., HYSENAJ, G., SINGH, B., SKALIC, M., ELLIOTT, D. J. & EYRAS, E. 2018.  
779 SUPPA2: fast, accurate, and uncertainty-aware differential splicing analysis across multiple  
780 conditions. *Genome Biol*, 19, 40.

781 WICKER-THOMAS, C., GARRIDO, D., BONTONOU, G., NAPAL, L., MAZURAS, N., DENIS, B., RUBIN, T.,  
782 PARVY, J. P. & MONTAGNE, J. 2015. Flexible origin of hydrocarbon/pheromone precursors in  
783 *Drosophila melanogaster*. *J Lipid Res*, 56, 2094-101.  
784 ZHU, A., IBRAHIM, J. G. & LOVE, M. I. 2019. Heavy-tailed prior distributions for sequence count data:  
785 removing the noise and preserving large differences. *Bioinformatics*, 35, 2084-2092.

786

787

788

789

790

791

792



793 Supplementary Information for:

794 **Cuticular hydrocarbon biosynthesis in malaria vectors: insights from the adult oenocyte**  
795 **transcriptome.**

796 Linda Grigoraki, Xavier Grau-Bove, Henrietta Carrington-Yates, Gareth J Lycett and Hilary Ranson

797

798 Corresponding authors: Linda Grigoraki and Hilary Ranson

799 [Linda.Grigoraki@lstmed.ac.uk](mailto:Linda.Grigoraki@lstmed.ac.uk), [Hilary.Ranson@lstmed.ac.uk](mailto:Hilary.Ranson@lstmed.ac.uk)

800 This PDF file includes:

801 Supplementary text: Differential expression of splice isoforms in oenocytes

802 Figures S1-S8

803 Tables S1-S3

804 Legends for Datasets S1-S4

805

806 Supplementary text:

807 **Differential expression of splice isoforms in oenocytes**

808 We investigated whether specific gene isoforms are differentially expressed in oenocytes (at  
809 a  $p < 0.05$ ). 672 genes were found to have at least one isoform differentially expressed in  
810 female oenocytes compared to female carcass cells and 752 to have at least one isoform  
811 differentially expressed in male oenocytes compared to male carcass cells. The same analysis  
812 was performed for female and male oenocytes showing 578 genes to have at least one  
813 isoform differentially expressed between sexes (Supplementary File 2 and Supplementary  
814 Figure 3A). Five genes belonging to one of the six gene families implicated in the hydrocarbon  
815 biosynthetic pathway (the elongase AGAP004373, the desaturases AGAP003051,  
816 AGAP004572 and AGAP01713 and the decarboxylase P450 Cyp4G16) had at least one isoform  
817 differentially expressed in at least two of the three comparisons (female oenocytes vs female  
818 total carcass cells, male oenocytes vs male total carcass cells and female vs male oenocytes)  
819 (Supplementary Figure 3B). Most of the isoforms for these genes differ solely in the  
820 untranslated regions. Exceptions are the RD isoform of Cyp4G16 that encodes for a slightly  
821 truncated protein with a different C-terminus (last 19 a.a) compared to the other isoforms,  
822 and isoforms RA and RB of the desaturase AGAP003051, which encode proteins with highly  
823 diverged C-termini. We need however to point out that the two predicted isoforms for  
824 AGAP003051 might be affected by some annotation error, as the AGAP003051-RB isoform is  
825 identical with the adjacent AGAP003050 transcript after nucleotide 407 (total length of 1038  
826 nt). The AGAP003051-RB isoform was more abundant in oenocytes compared to total Carcass  
827 cells and more abundant in female oenocytes compared to male oenocytes, although this  
828 latter difference was clearly driven by one of the male oenocyte replicates. The Cyp4G16-RD  
829 isoform was enriched in female oenocytes in comparison to both female carcass cells and  
830 male oenocytes (Supplementary Figure 3).

831

832

Total Carcass cells (Before FACS)

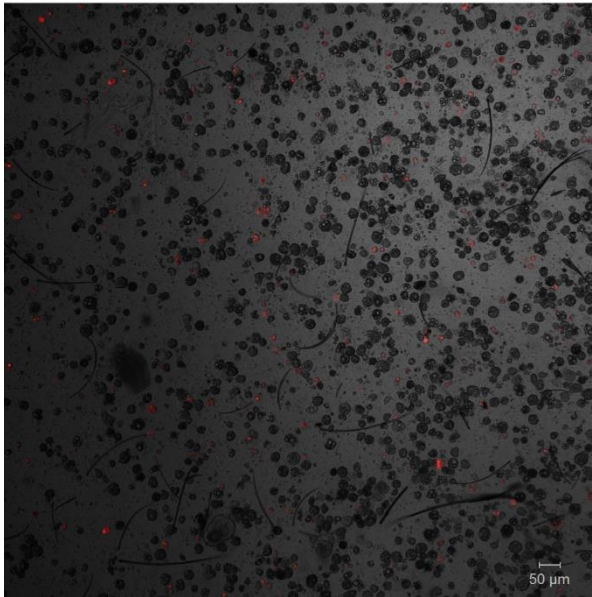

Isolated with FACS Oenocytes

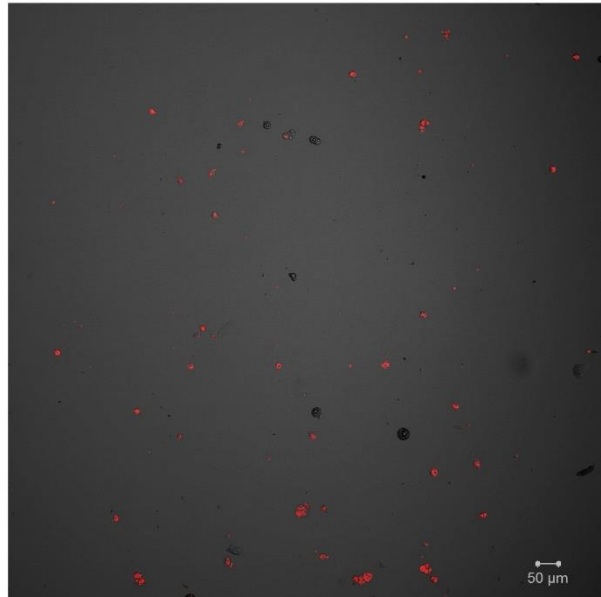

833

834 **Fig S1:** Representative confocal microscopy image for isolated oenocytes. A) carcass cells dissociated  
835 from transgenic mosquitoes (progeny of UAS-mCD8: mCherry line and Oeno-Gal4 driver line) with  
836 fluorescent oenocytes (pre-sorted total carcass cells sample) (objective 10X) and B) confocal  
837 microscopy image for cells isolated with FACS (sample of isolated oenocytes) (objective 10X).

838

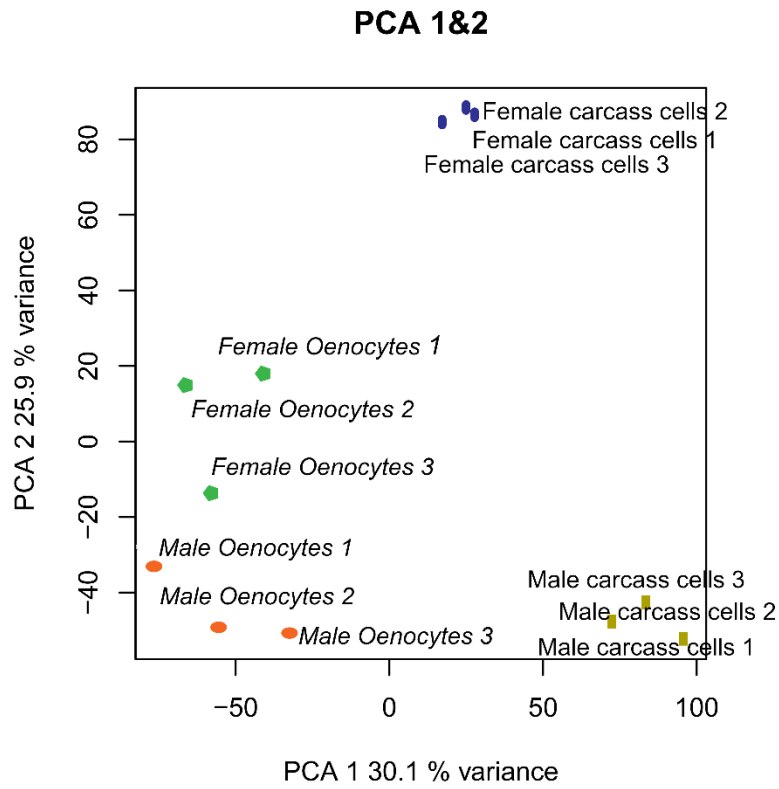

839

840 **Fig S2:** PCA analysis for the twelve samples used in RNAseq.

841

A) Overlap of differentially spliced genes and isoforms between Oenocytes and carcass cells, in male and female *An. gambiae*

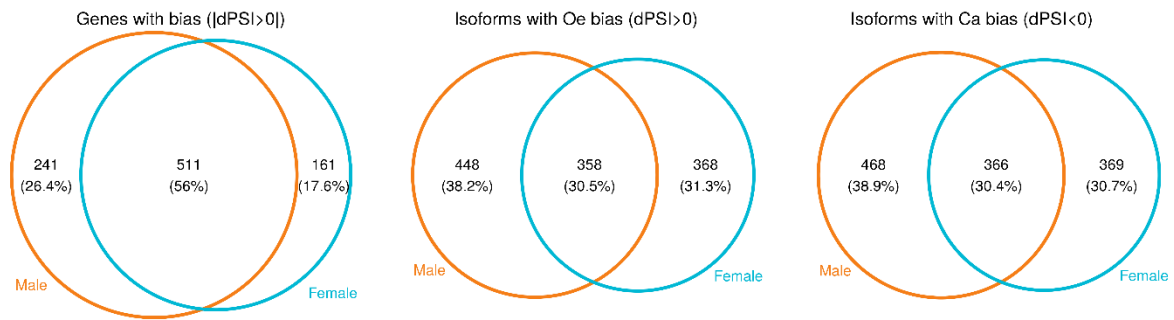

B) Differential inclusion of selected isoforms

AGAP004373

elongation of very long chain fatty acids protein 1

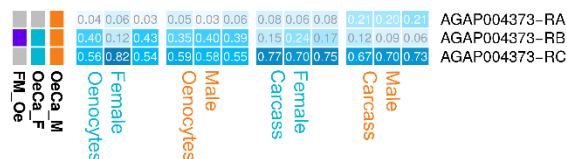

AGAP004572

desaturase (unnamed)

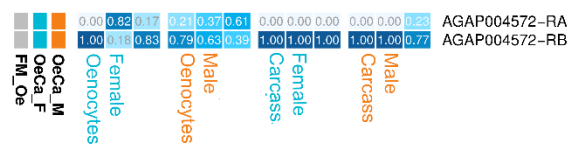

AGAP001713

stearoyl-CoA desaturase (delta-9 desaturase)

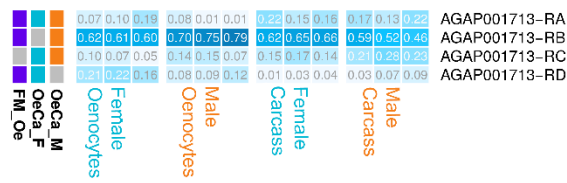

AGAP001076

CYP4G16 cytochrome P450

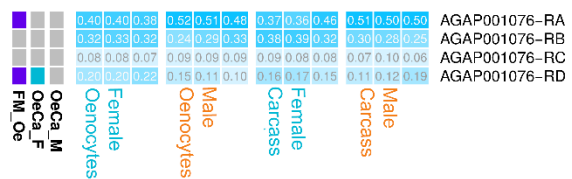

AGAP003051

stearoyl-CoA desaturase (delta-9 desaturase)

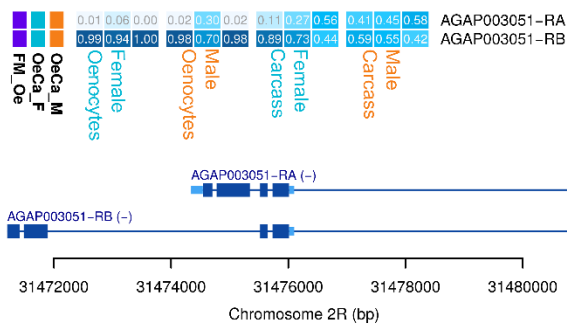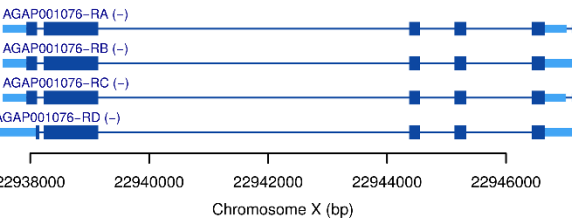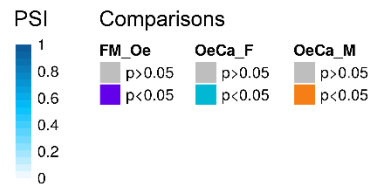

842

843 **Fig S3:** Splice variant analysis. A) Venn diagram (on the left) showing the number of genes with  
 844 differential expression of at least one isoform in female and/or male oenocytes compared to total  
 845 carcass cells. Venn diagrams showing the number of gene isoforms with enriched (middle diagram) or  
 846 reduced (right diagram) expression in female and/or male oenocytes compared to total carcass cells.  
 847 B) Heat maps showing the frequency (PSI) of isoforms (in each sample used for RNAseq) for genes  
 848 belonging to gene families implicated in CHC biosynthesis. Isoforms that encode for different proteins  
 849 are depicted. Comparisons performed: Female Oenocytes vs Female total carcass cells (OeCa\_F), Male  
 850 Oenocytes vs Male total carcass cells (OeCa\_M), Female Oenocytes vs Male Oenocytes (FM\_Oe).  
 851 Source data: Supplementary File 2.

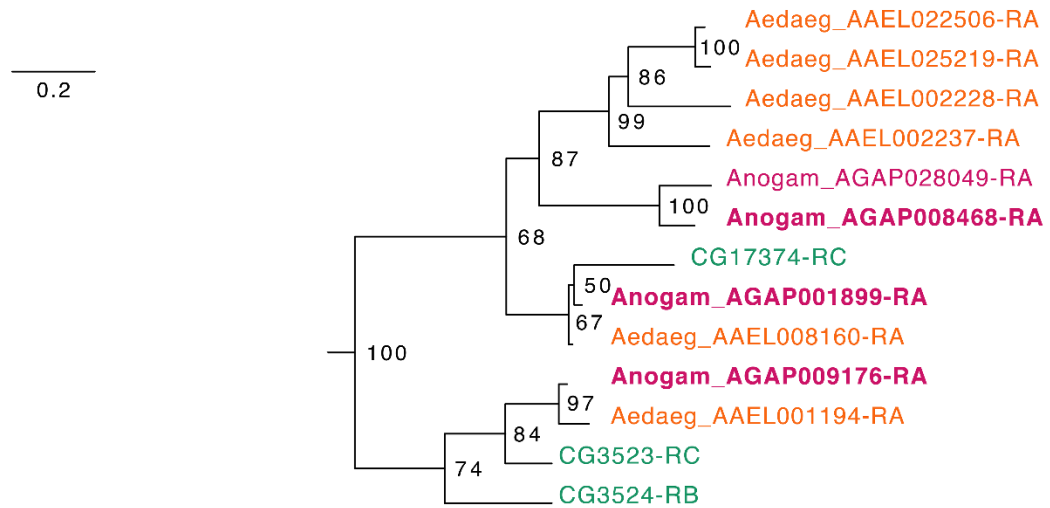

852

853 **Fig S4:** Phylogenetic tree for *Anopheles gambiae*, *Aedes aegypti* and *Drosophila melanogaster* Fatty  
854 acid synthases. Scale bar shows the number of amino acid substitutions per alignment position. Node  
855 supports are % of bootstrap supports on 1,000 replications.

856

857

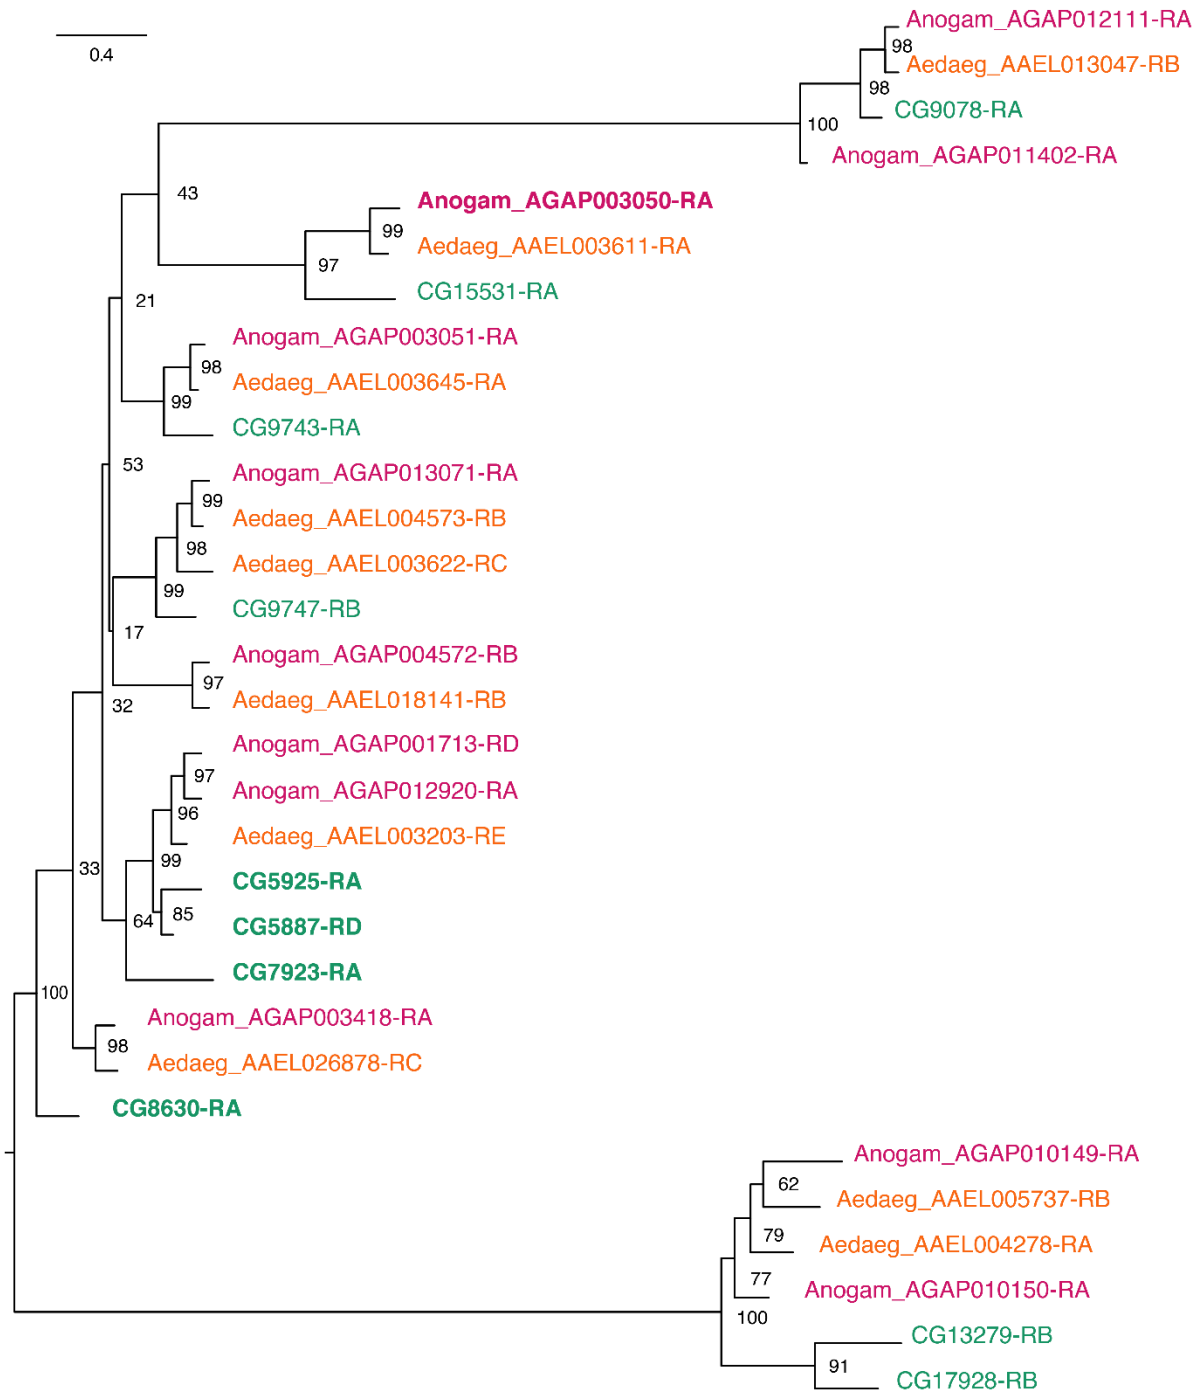

858

859 **Fig S5:** Phylogenetic tree for *Anopheles gambiae*, *Aedes aegypti* and *Drosophila melanogaster*  
860 Desaturases. Scale bar shows the number of aminoacid substitutions per alignment position. Node  
861 supports are % of bootstrap supports on 1,000 replications.

862

863

864

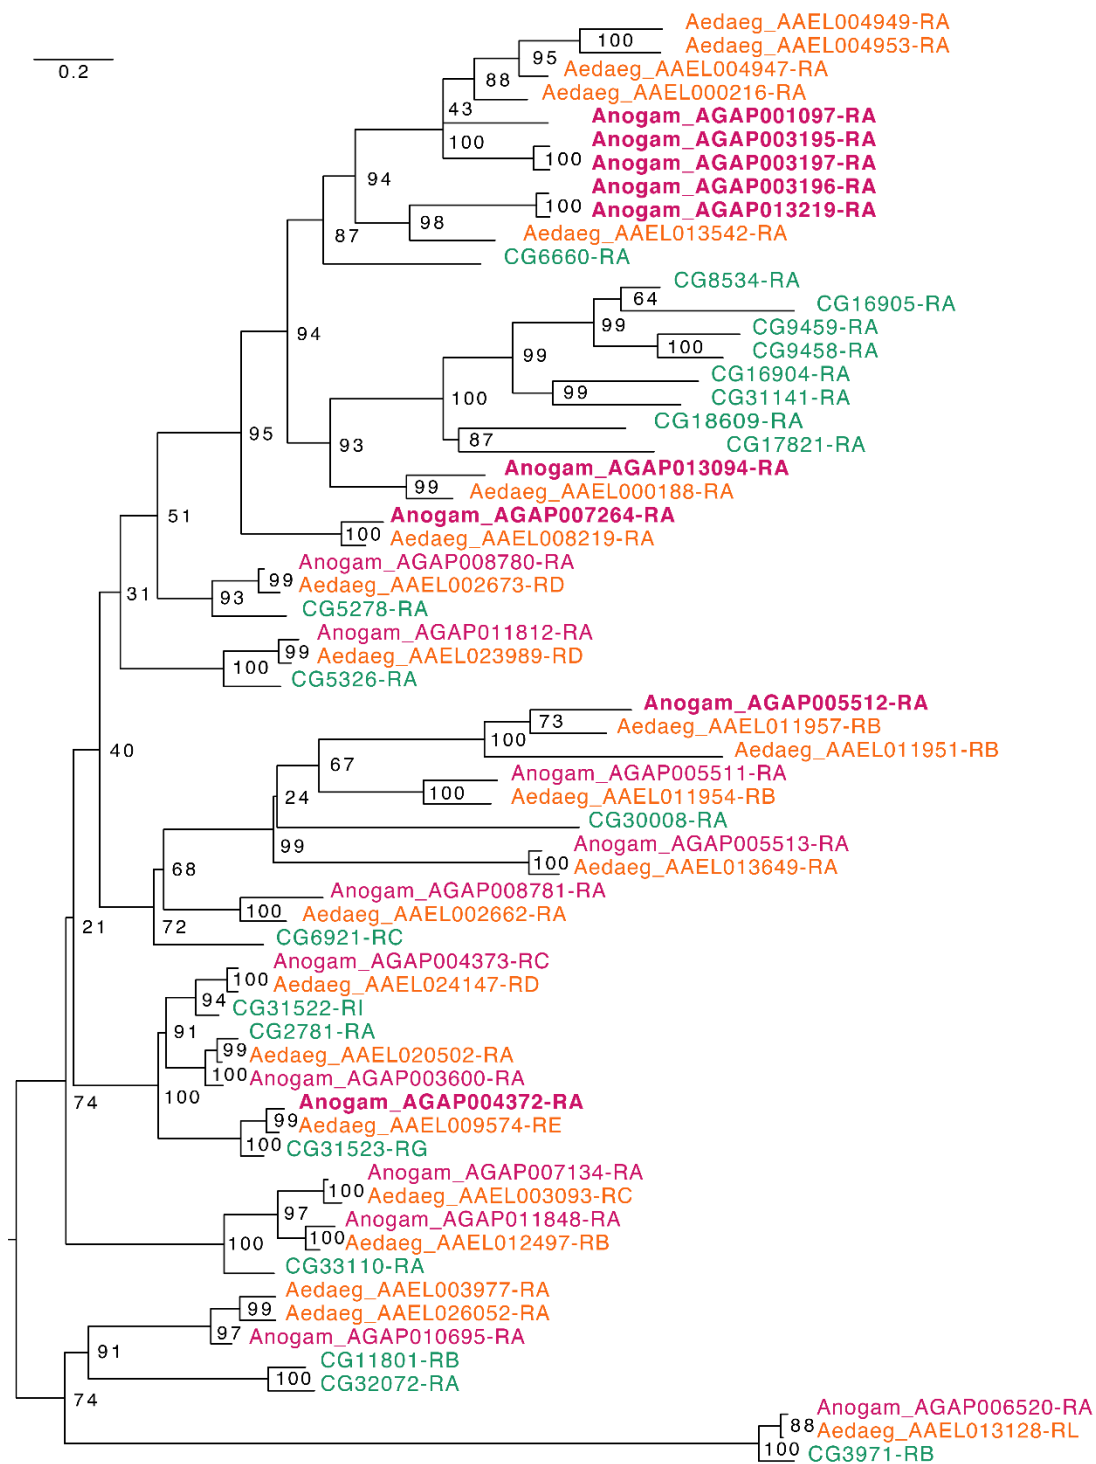

865

866 **Fig S6:** Phylogenetic tree for *Anopheles gambiae*, *Aedes aegypti* and *Drosophila melanogaster*  
867 Elongases. Scale bar shows the number of aminoacid substitutions per alignment position. Node  
868 supports are % of bootstrap supports on 1,000 replications.

869

870

871

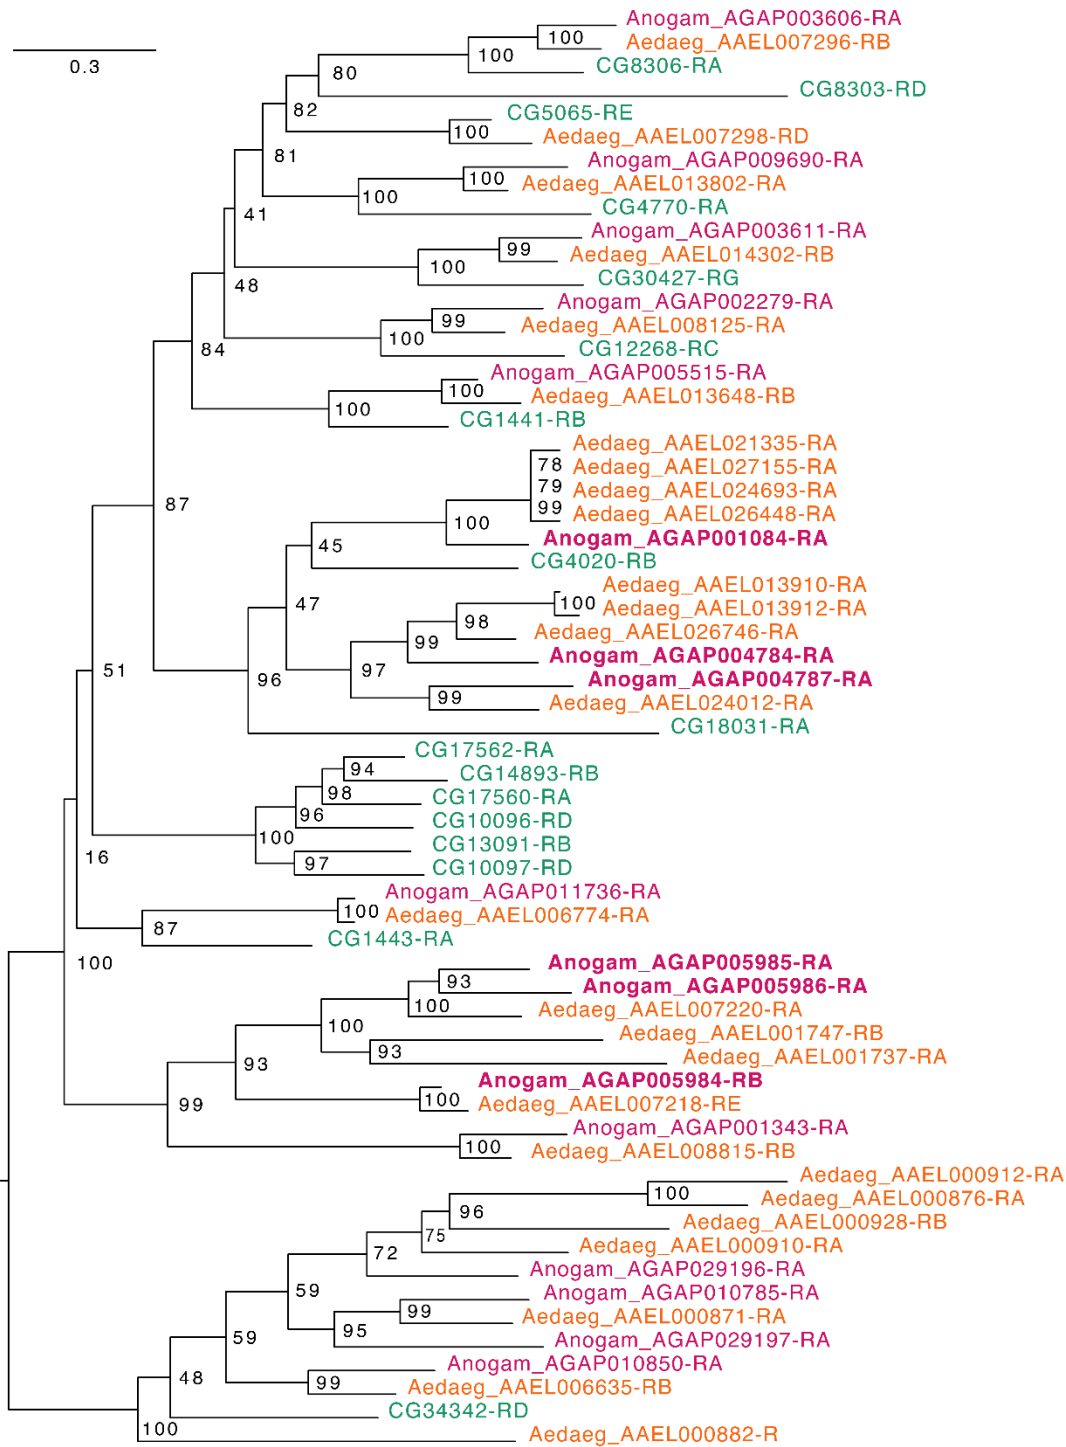

872

873 **Fig S7:** Phylogenetic tree for *Anopheles gambiae*, *Aedes aegypti* and *Drosophila melanogaster* Fatty  
874 acyl-CoA reductases. Scale bar shows the number of amino acid substitutions per alignment  
875 position. Node supports are % of bootstrap supports on 1,000 replications.

876

877



A.

FAS1899i

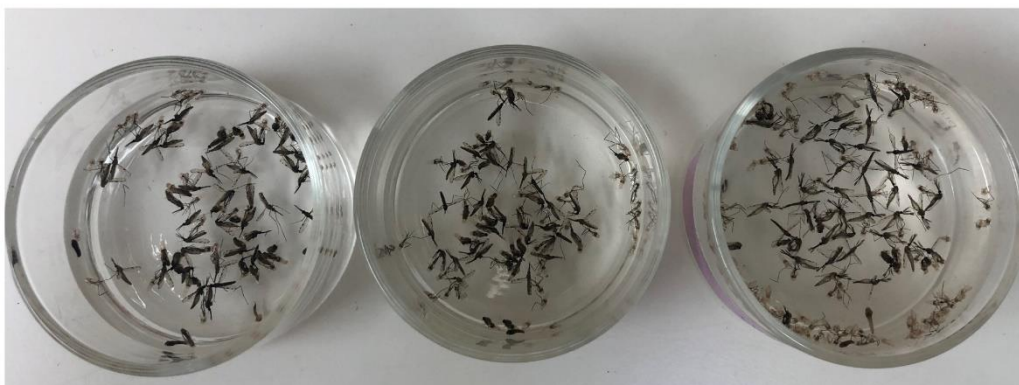

Control siblings

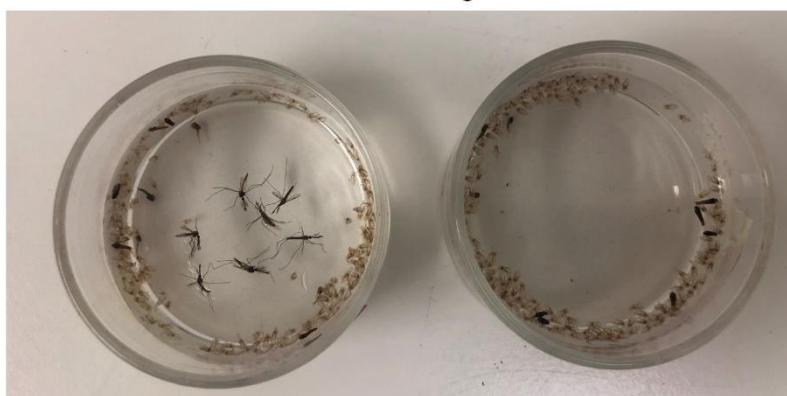

B.

Desat3050i

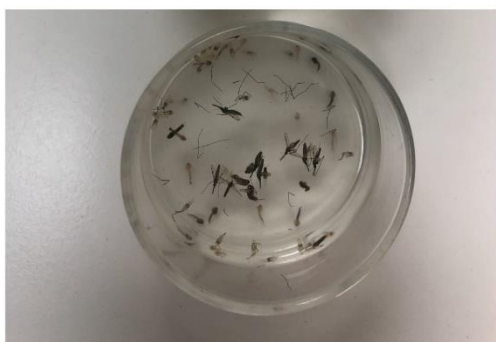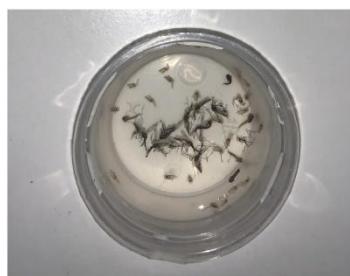

Control siblings

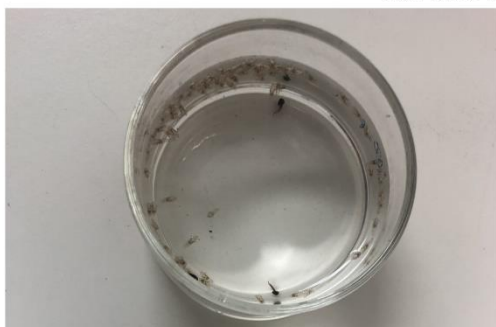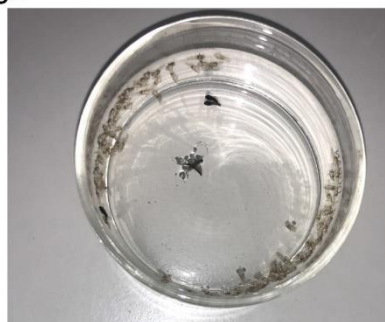

879 **Fig S8:** Lethality phenotype of progeny from crosses A) UAS-FAS1899i x Ubi-A10 Gal4 and B) UAS-  
880 Desat3050i x Ubi-A10 Gal4. In each panel the upper photograph corresponds to individuals with  
881 FAS1899 or Desat3050 knockdown. The lower photograph corresponds to control siblings, showing  
882 the pupae cases left after successful adult emergence.

883

884

885 Table S1: Samples used for Illumina RNAseq. Number of raw reads produced for each sample and  
886 number of reads after quality control.

887

| Sample          | Sex    | Tissue    | # raw reads | # reads postQC | % reads postQC |
|-----------------|--------|-----------|-------------|----------------|----------------|
| Sample_1-1F     | Female | Oenocytes | 33819432    | 32551857       | 96.25%         |
| Sample_2-2F     | Female | Oenocytes | 33113392    | 31896623       | 96.33%         |
| Sample_3-3F     | Female | Oenocytes | 39251164    | 38036798       | 96.91%         |
| Sample_4-4M     | Male   | Oenocytes | 32539976    | 31437568       | 96.61%         |
| Sample_5-5M     | Male   | Oenocytes | 25424014    | 24436348       | 96.12%         |
| Sample_6-6M     | Male   | Oenocytes | 40072886    | 39086446       | 97.54%         |
| Sample_7-7BCF   | Female | Carcass   | 33445880    | 32562341       | 97.36%         |
| Sample_8-8BCF   | Female | Carcass   | 53419358    | 52054378       | 97.44%         |
| Sample_9-9BCF   | Female | Carcass   | 38663816    | 37832559       | 97.85%         |
| Sample_10-10BCM | Male   | Carcass   | 41441984    | 40404352       | 97.50%         |
| Sample_11-11BCM | Male   | Carcass   | 38099604    | 37047825       | 97.24%         |
| Sample_12-12BCM | Male   | Carcass   | 42194602    | 41132109       | 97.48%         |
| TOTAL           | -      | -         | 4,51E+08    | 4,38E+08       | 97.12%         |

888

889

890 Table S2: Genes, members of gene families implicated in CHC biosynthesis and over-expressed in  
 891 oenocytes, ranked in order of highest to lowest expression in Female Oenocytes. Their differential  
 892 expression (Log<sub>2</sub>Fold change) compared to female carcass cells is also shown. Genes above the  
 893 double line are within the 200 most highly expressed genes.

894

895

| Gene                                   | RNAseq Normalized counts in Female Oenocytes | Log <sub>2</sub> Fold Change (all at p-value<0.001) |
|----------------------------------------|----------------------------------------------|-----------------------------------------------------|
| Cyp4G16                                | 266337                                       | 3,29                                                |
| Fatty acid synthase<br>AGAP001899      | 105057                                       | 3,44                                                |
| Cyp4G17                                | 93677                                        | 3,26                                                |
| Elongase AGAP007264                    | 34216                                        | 3,16                                                |
| Fatty acid synthase<br>AGAP028049      | 22062                                        | 3,37                                                |
| Fatty acid Reductase<br>AGAP004787     | 21437                                        | 2,87                                                |
| Elongase AGAP013094                    | 17688                                        | 3,73                                                |
| Propionyl-CoA synthetase<br>AGAP001473 | 15219                                        | 3,31                                                |
| Desaturase AGAP003050                  | 15068                                        | 3,03                                                |
| Fatty acid Reductase<br>AGAP005984     | 13904                                        | 2,60                                                |
| Fatty acid Synthase<br>AGAP008468      | 13811                                        | 3,33                                                |
| Fatty acid Reductase<br>AGAP005986     | 13041                                        | 3,02                                                |
| Elongase AGAP003197                    | 11810                                        | 3,52                                                |
| Elongase AGAP003195                    | 9596                                         | 3,49                                                |
| Elongase AGAP003196                    | 7688                                         | 3,36                                                |
| Fatty acid Reductase<br>AGAP004784     | 7504                                         | 3,41                                                |
| Fatty acid Reductase<br>AGAP005985     | 7160                                         | 1,85                                                |
| Elongase AGAP001097                    | 6026                                         | 3,36                                                |
| Elongase AGAP005512                    | 5523                                         | 3,05                                                |
| Elongase AGAP013219                    | 5099                                         | 3,84                                                |
| Elongase AGAP004372                    | 4785                                         | 2,92                                                |

896

897

898 Table S3: Genes, members of gene families implicated in CHC biosynthesis and over-expressed in  
 899 oenocytes, ranked in order of highest to lowest expression in Male Oenocytes. Their differential  
 900 expression (Log<sub>2</sub>Fold change) compared to male carcass cells is also shown. Genes above the double  
 901 line are within the 200 most highly expressed genes.

902

903

| Gene                                   | RNAseq Normalized counts in Male Oenocytes | Log <sub>2</sub> Fold Change (all at p-value<0.001) |
|----------------------------------------|--------------------------------------------|-----------------------------------------------------|
| Cyp4G16                                | 364580                                     | 2,83                                                |
| Cyp4G17                                | 137776                                     | 3,23                                                |
| Fatty acid synthase<br>AGAP001899      | 97839                                      | 3,08                                                |
| Elongase AGAP007264                    | 49263                                      | 3,08                                                |
| Fatty acid synthase<br>AGAP028049      | 25170                                      | 2,95                                                |
| Propionyl-CoA synthetase<br>AGAP001473 | 23730                                      | 3,22                                                |
| Fatty acid Reductase<br>AGAP004787     | 22177                                      | 3,02                                                |
| Fatty acid Synthase<br>AGAP008468      | 21699                                      | 3,08                                                |
| Elongase AGAP013094                    | 21692                                      | 3,00                                                |
| Desaturase AGAP003050                  | 17972                                      | 2,99                                                |
| Fatty acid Reductase<br>AGAP005986     | 14351                                      | 3,35                                                |
| Fatty acid Reductase<br>AGAP005984     | 14128                                      | 2,48                                                |
| Elongase AGAP003197                    | 10167                                      | 2,89                                                |
| Elongase AGAP003195                    | 7320                                       | 2,74                                                |
| Elongase AGAP001097                    | 6301                                       | 2,78                                                |
| Fatty acid Reductase<br>AGAP004784     | 5009                                       | 2,73                                                |
| Fatty acid Reductase<br>AGAP005985     | 3459                                       | 3,07                                                |
| Elongase AGAP004372                    | 2932                                       | 1,91                                                |
| Elongase AGAP005512                    | 2762                                       | 2,42                                                |
| Elongase AGAP003196                    | 2248                                       | 2,34                                                |
| Elongase AGAP013219                    | 753                                        | 2,45                                                |

904

905

906 **Supplementary File 1:** Genes differentially expressed in female oenocytes vs female total  
 907 carcass cells (sheet 1); in male oenocytes vs male total carcass cells (sheet 2) and genes

908 commonly over-expressed in female and male oenocytes compared to female and male  
909 total carcass cells (sheet 3).

910 **Supplementary File 2:** Genes showing isoform specific differential expression in oenocytes.  
911 Comparisons performed are: Female Oenocytes vs Female total Carcass cells (sheet 1), Male  
912 Oenocytes vs Male total Carcass cells (sheet 2) and Female Oenocytes vs Male Oenocytes  
913 (sheet 3).

914 **Supplementary File 3:** Genes differentially expressed in female oenocytes vs male  
915 oenocytes

916 **Supplementary File 4:** GC-MS analysis of CHCs. The CHC peaks identified in each sample are  
917 shown as well as their amount (ngr) (in 2 $\mu$ l of hexane extract) normalized to the internal  
918 standard. A summary of the total ngr of CHCs/mgr is provided for all samples. In the last  
919 sheet the FAS1899i females and control females are used to show the relative abundance  
920 (in % to the total) of each CHC peak.

921

### A. Extraction of mosquito carcass cells

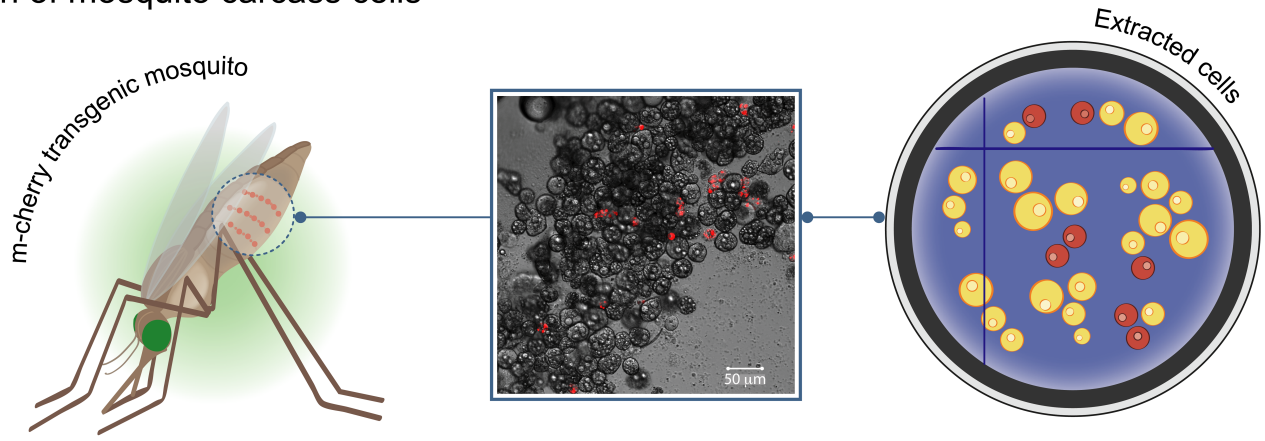

### B. Isolation of oenocytes with FACS

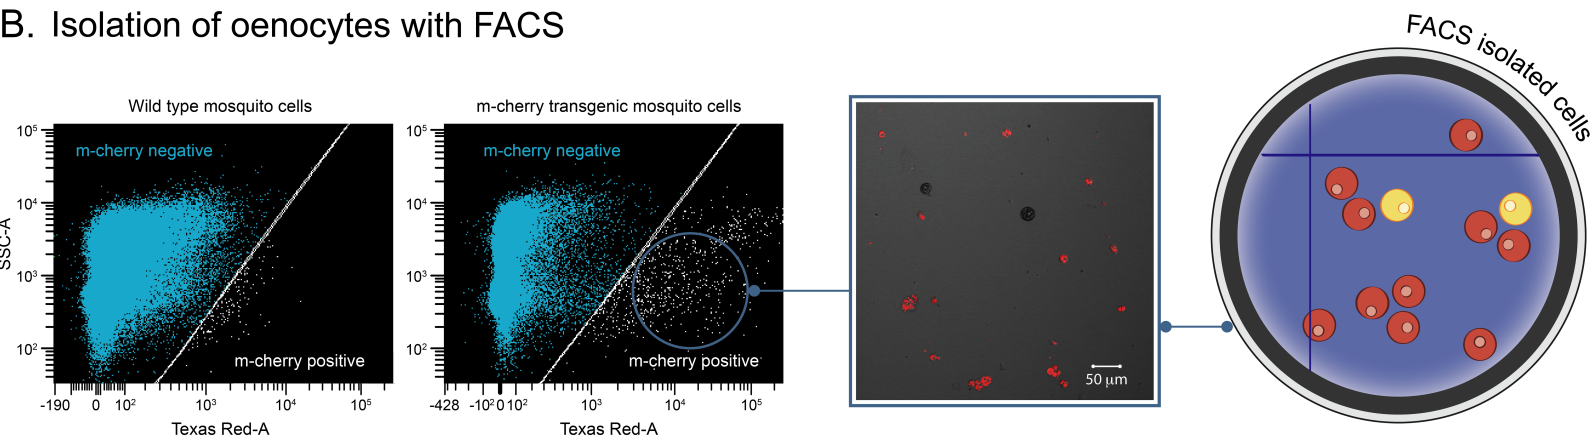

### C. Transcriptional analysis of oenocytes

Genes overexpressed in oenocytes

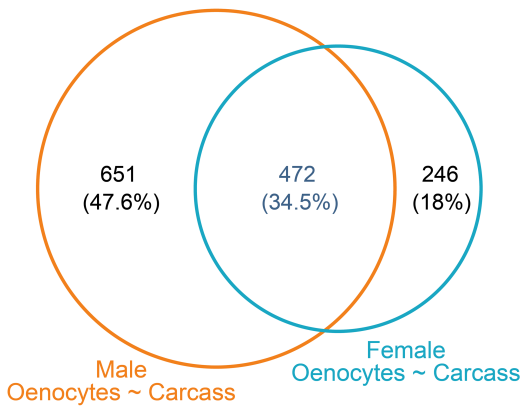

Functions enriched in overexpressed genes (n=472)

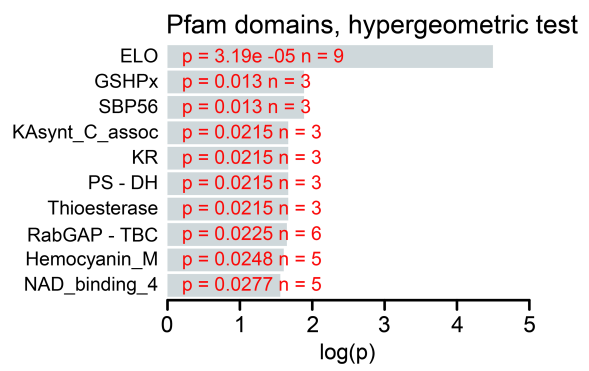

GO: biological process, Fisher test

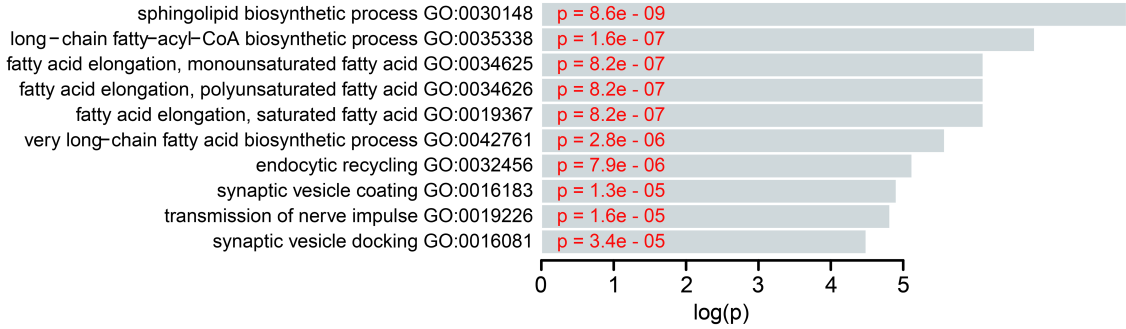

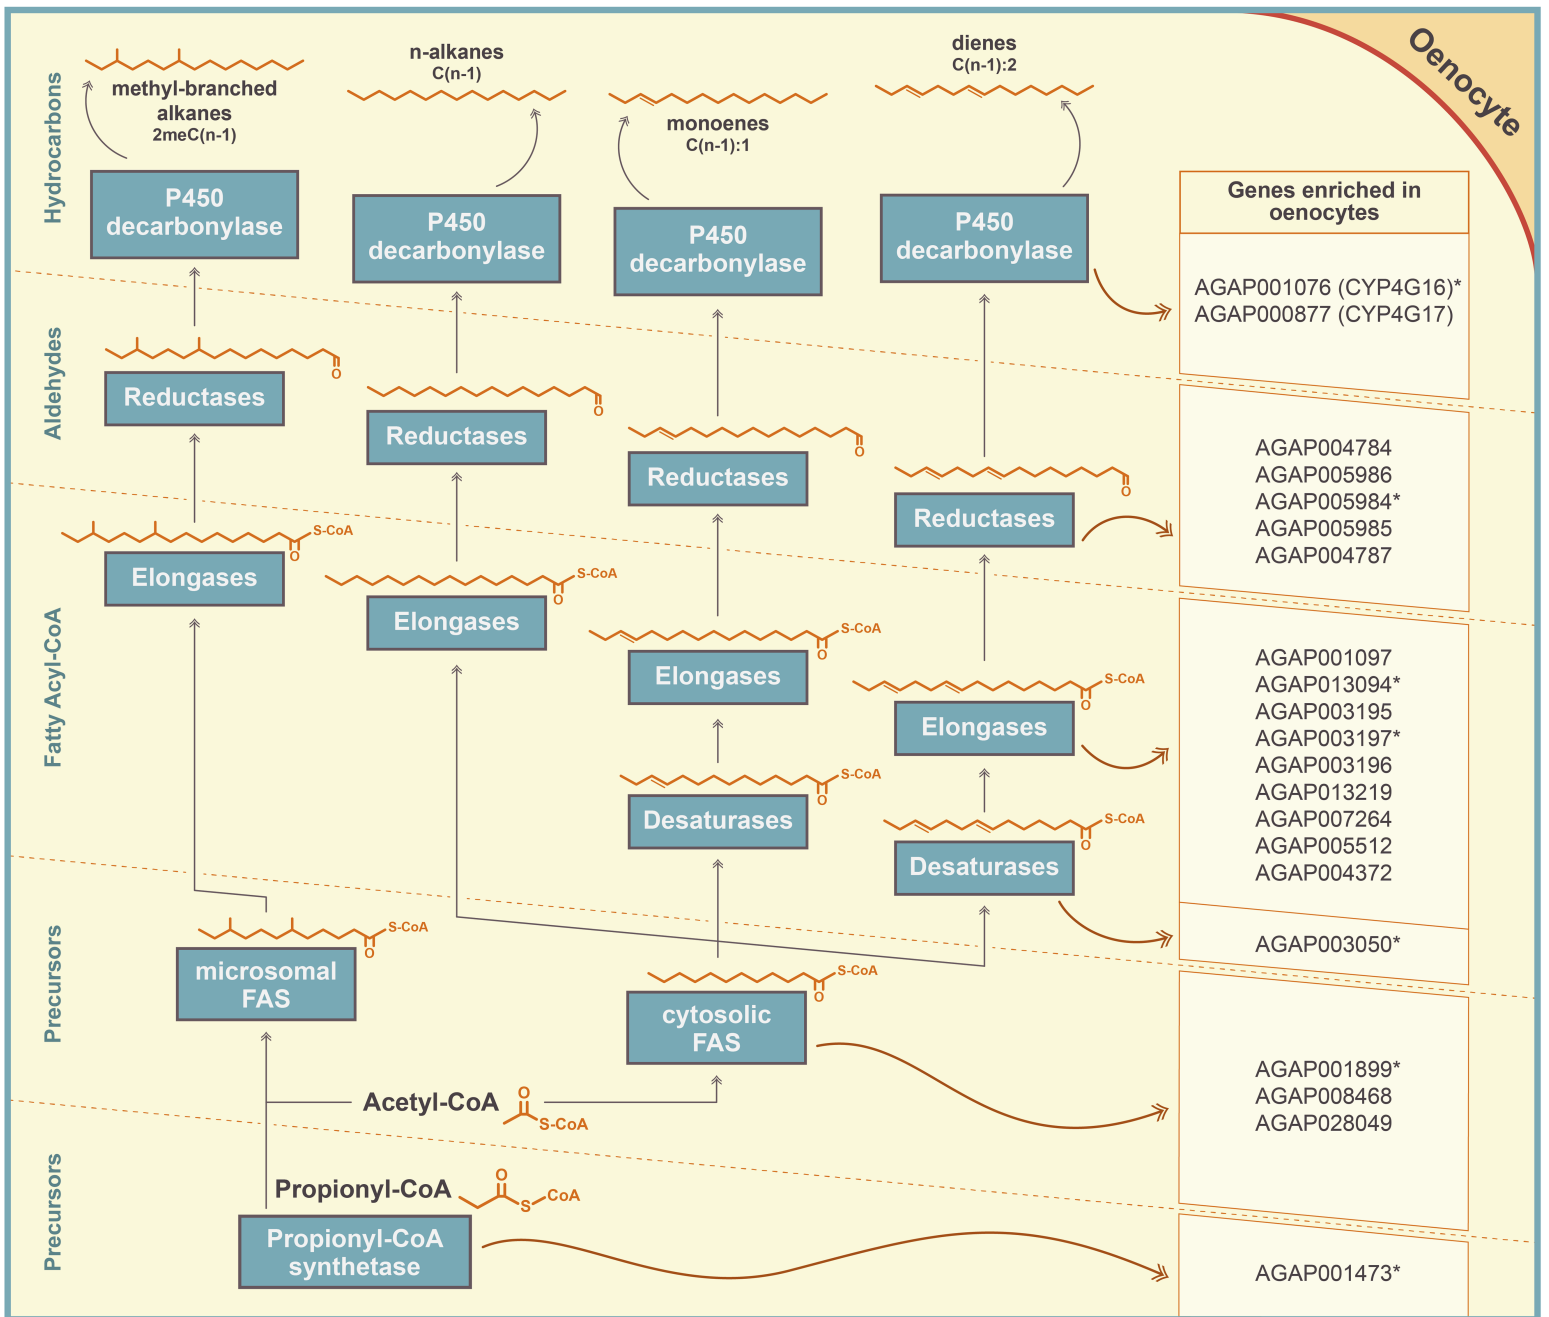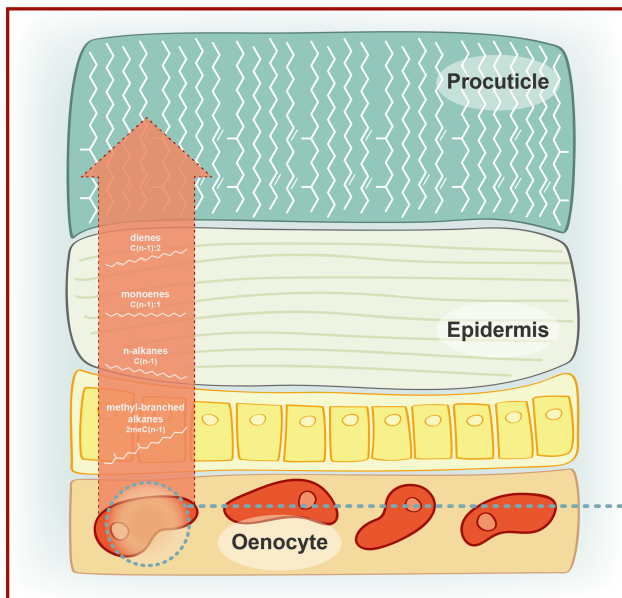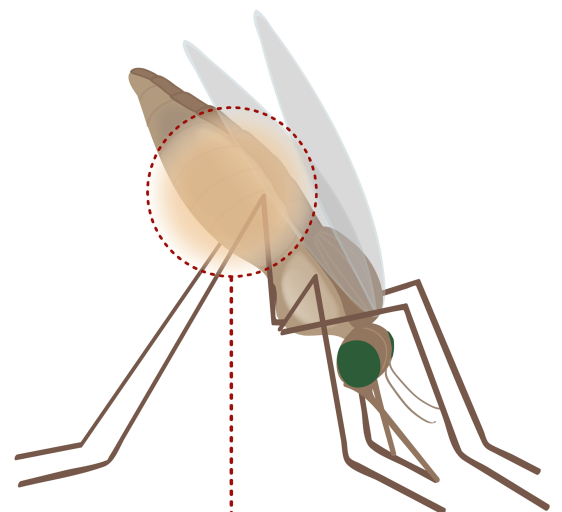



**A) Fatty acid synthases**

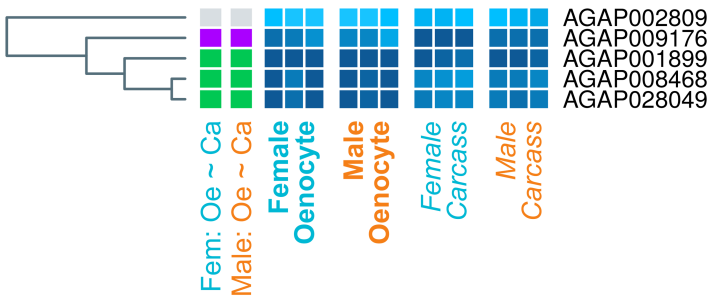

**B) Fatty acid reductases**

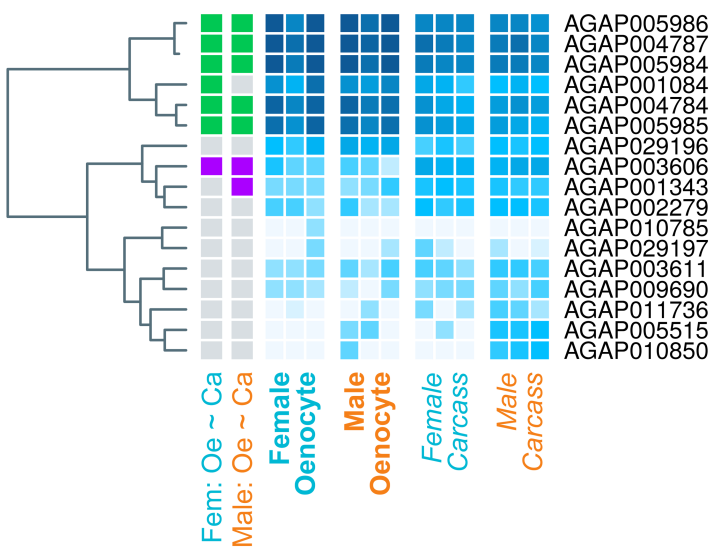

**C) Fatty acid elongases**

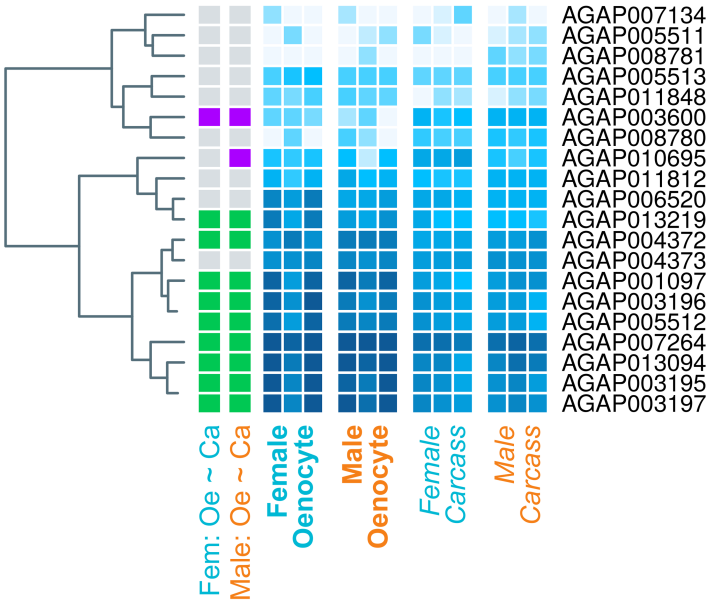

**D) Fatty acid desaturases**

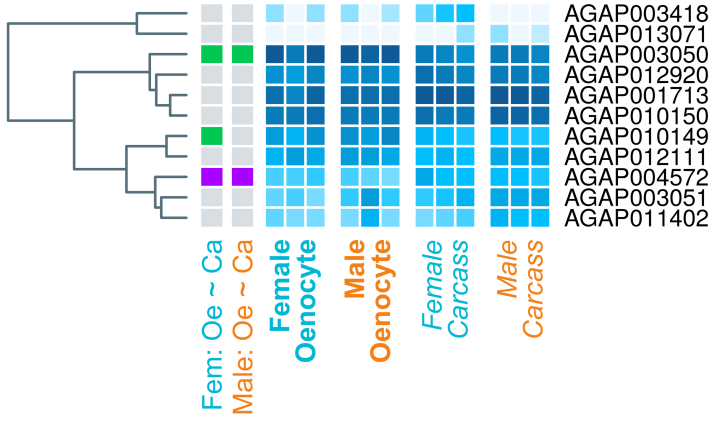

**A) FA synthases**

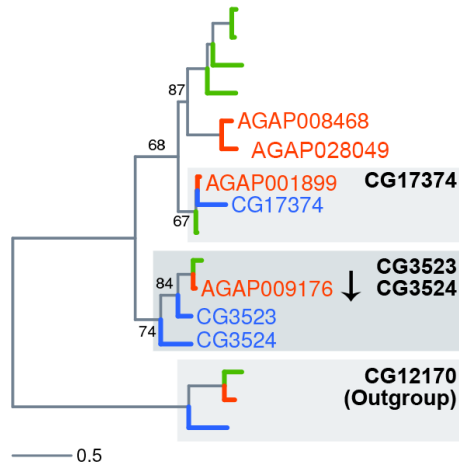

**B) FA desaturases**

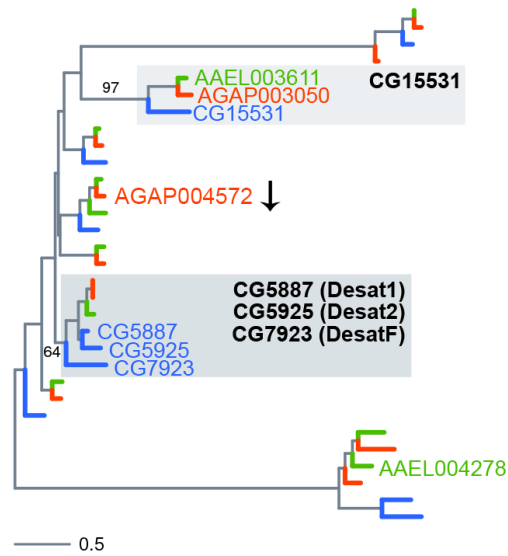

**C) FA elongases**

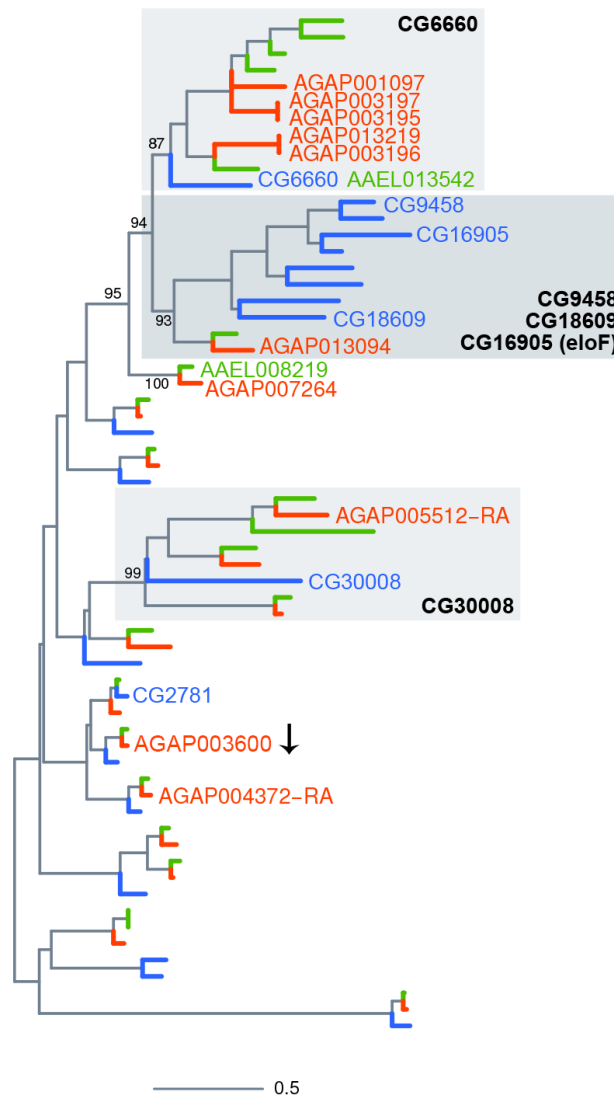

**D) FA reductases**

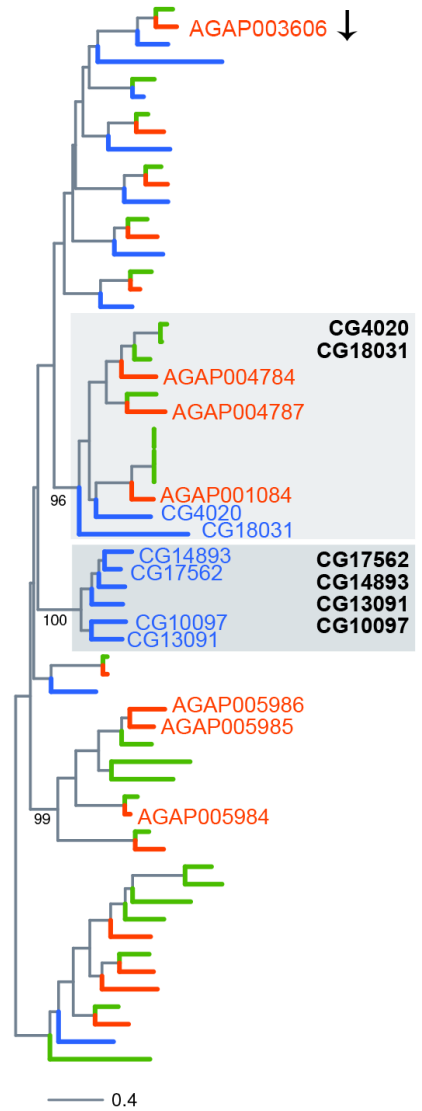

- *Anopheles gambiae*
- *Aedes aegypti*
- *Drosophila melanogaster*

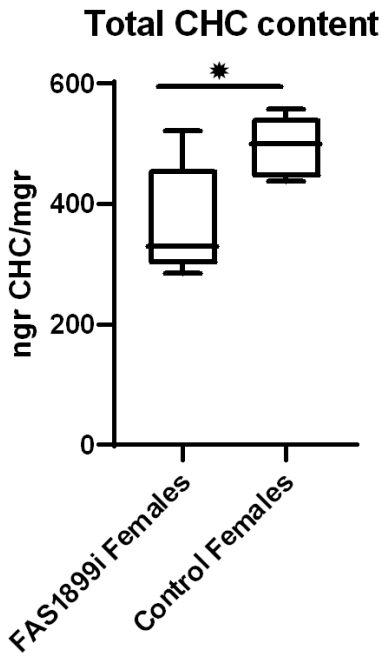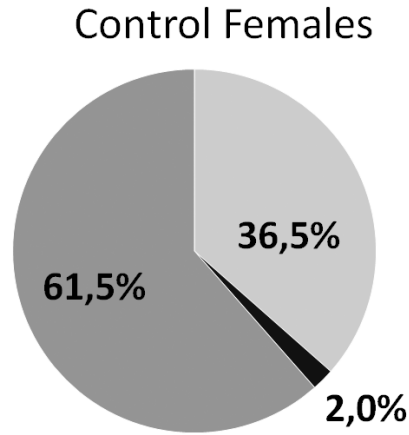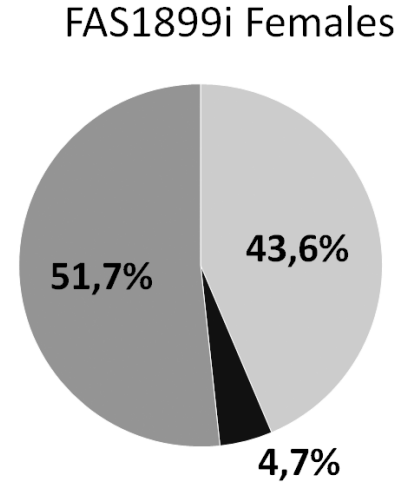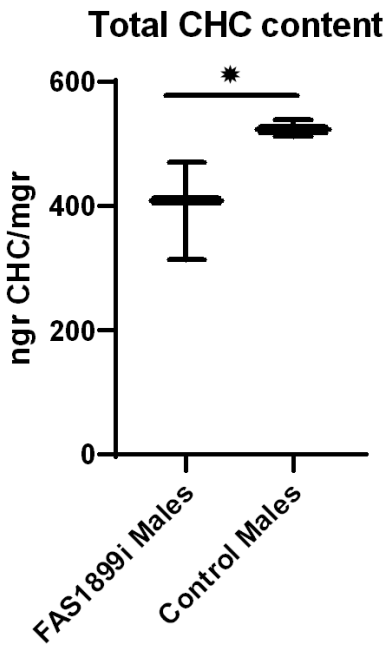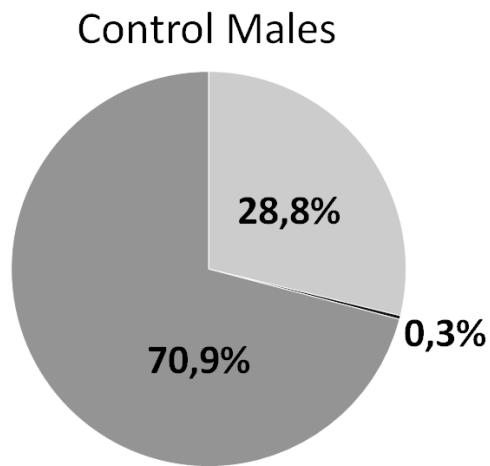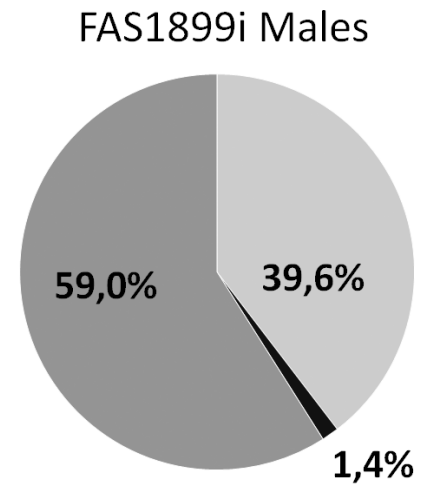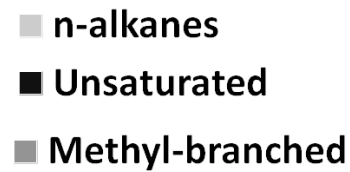

Source: https://www.biorxiv.org/content/biorxiv/early/2020/05/01/2020.04.28.065938.full.pdf
